## **Disproportionate CH<sub>4</sub> sink strength from an endemic, sub-alpine Australian soil microbial community**

M.D. McDaniel<sup>1,2\*†</sup>, M. Hernández<sup>3,4\*</sup>, M.G. Dumont<sup>3,5</sup>, L.J. Ingram<sup>1</sup>, and M.A. Adams<sup>1,6</sup>

1. Centre for Carbon Water and Food | Sydney Institute of Agriculture | University of Sydney | Sydney, Australia 2000
2. Department of Agronomy | Iowa State University | Ames, Iowa USA 50011
3. Max Planck Institute for Terrestrial Microbiology | Marburg, Germany D-35037
4. School of Environmental Sciences | Norwich Research Park | University of East Anglia, Norwich, UK NR4 7TJ
5. Centre for Biological Sciences | University of Southampton | Southampton, UK SO17 1BJ
6. School of Science | Engineering and Technology | The University of Swinburne | Melbourne, Australia 3122

\* Co-first authors

† Corresponding Author:

Department of Agronomy  
Iowa State University  
2517 Agronomy Hall  
Ames, IA 50011  
Phone: (515) 294-7947  
Email: marsh@iastate.edu

**Running Title:** Strong CH<sub>4</sub> uptake from unique soil microbiota

## **Originality-Significance Statement (about 120-150 words)**

(Identify the key aspects of originality and significance that place the work within the top 10% of current research in environmental microbiology)

Novel methanotrophic bacteria have been discovered in recent years, but few studies have examined the total known diversity of methanotrophs together with the net flux of CH<sub>4</sub> from soils. We used an ecosystem with a vegetation-soil gradient in the sub-alpine regions of Australia (with extremely strong consumption of atmospheric CH<sub>4</sub>) to examine microbial and abiotic drivers of CH<sub>4</sub> fluxes across this gradient. Recently characterized methanotrophs, either USC $\alpha$  in forest and grassland soils, or oxygenic *Candidatus* Methylomirabilis sp. in the bog soil were dominant. Methanotrophs belonging to the families Methylococcaceae and Methylocystaceae represented only a small minority of the methanotrophs in this ecosystem.

1 **Abstract (200 words)**

2           Soil-to-atmosphere methane (CH<sub>4</sub>) fluxes are dependent on opposing microbial processes  
3 of production and consumption. Here we use a soil-vegetation gradient in an Australian sub-  
4 alpine ecosystem to examine links between composition of soil microbial communities, and the  
5 fluxes of greenhouse gases they regulate. For each soil-vegetation type (forest, grassland, and  
6 bog), we measured carbon dioxide (CO<sub>2</sub>) and CH<sub>4</sub> fluxes and their production/consumption at 5-  
7 cm intervals to a depth of 30 cm. All soils were sources of CO<sub>2</sub>, ranging from 49-93 mg CO<sub>2</sub> m<sup>-2</sup>  
8 h<sup>-1</sup>. Forest soils were strong net sinks for CH<sub>4</sub> at rates up to -413 μg CH<sub>4</sub> m<sup>-2</sup> h<sup>-1</sup>. Grassland  
9 soils varied with some soils acting as sources and some as sinks, but overall averaged -97 μg  
10 CH<sub>4</sub> m<sup>-2</sup> h<sup>-1</sup>. Bog soils were net sources of CH<sub>4</sub> (+340 μg CH<sub>4</sub> m<sup>-2</sup> h<sup>-1</sup>). Methanotrophs were  
11 dominated by USCα in forest and grassland soils, and *Candidatus Methyloirabilis* sp. in the  
12 bog soils. *Methylocystis* were also detected at relatively low abundance. The potential  
13 disproportionately large contribution of these ecosystems to global CH<sub>4</sub> oxidation, and poorly  
14 understood microbial community regulating it, highlight our dependence on soil ecosystem  
15 services in remote locations can be driven by a unique population of soil microbes.

16

17 **Keywords:** carbon dioxide; methane; 16S rRNA, methanotroph; methanogen; *Methyloirabilis*;  
18 USCalpha, *pmoA*

## 19 **Introduction**

20           Counteracting biogeochemical processes that consume or produce greenhouse gases  
21 (GHGs) regulate whether soils act as net sources or sinks. The magnitude and spatial  
22 distributions of these competing processes – whether across landscapes, with soil depth (Conrad  
23 and Rothfuss, 1991; Bender and Conrad, 1994; He *et al.*, 2012), or even within soil aggregates  
24 (Sexstone *et al.*, 1985; Ebrahimi and Or, 2016; Karbin *et al.*, 2016) – determine net release or  
25 uptake. Soils, especially upland and older soils, are nearly always sources of carbon dioxide  
26 (CO<sub>2</sub>) to the atmosphere, owing to production of CO<sub>2</sub> via heterotrophic and root respiration,  
27 which overwhelm slow rates of autotrophic CO<sub>2</sub> consumption. On the other hand, soils can  
28 routinely be either sources or sinks for methane (CH<sub>4</sub>) and nitrous oxide. In some cases, soils  
29 can switch from being a net source to a net sink for CH<sub>4</sub> and N<sub>2</sub>O in a matter of minutes to hours  
30 (Harriss *et al.*, 1982; Wille *et al.*, 2008; McDaniel *et al.*, 2014; Hernández *et al.*, 2017).  
31 Similarly, a lateral distance of just a meter or two may result in sinks becoming sources, or vice  
32 versa (Velthof *et al.*, 1996; Priemé *et al.*, 1997; McDaniel *et al.*, 2017).

33           Methane is a potent greenhouse gas, 34 times as potent as CO<sub>2</sub>, and is responsible for  
34 ~17% of anthropogenic warming (Stocker, 2013). Soil sources and sinks for CH<sub>4</sub> are controlled  
35 by abundance and composition of specific microbial communities (Murrell and Jetten, 2009;  
36 Nazaries, Murrell, *et al.*, 2013), but also regulated by abiotic factors (Sullivan *et al.*, 2010; Wu *et*  
37 *al.*, 2010; Wolf *et al.*, 2012). Oxidation of CH<sub>4</sub> to microbial biomass and CO<sub>2</sub> is, for example,  
38 restricted to distinct groups of specialized methanotrophic microorganisms. Aerobic  
39 methanotrophs belonging to the  $\alpha$ -Proteobacteria and  $\delta$ -Proteobacteria have been studied for  
40 decades and detected across a wide range of habitats (Knief, 2015). Groundbreaking research in  
41 recent years has uncovered previously uncharacterized methanotrophs, including acidophilic

42 Verrucomicrobia from the family Methylophilaceae (Khadem *et al.*, 2012) and intra-  
43 oxygenic methanotrophs, *candidatus* Methylophilus oxyfera, from the NC10 phylum (Ettwig  
44 *et al.*, 2010). In addition, more recent studies have identified USC $\alpha$  methanotrophs, which are  
45 specialized atmospheric-CH<sub>4</sub> consuming bacteria whose activity has been known for decades but  
46 had evaded efforts to be isolated or characterized (Pratscher *et al.*, 2018; Singleton *et al.*, 2018;  
47 Tveit *et al.*, 2019). The first step in the biochemical pathways of CH<sub>4</sub> oxidation is catalyzed by  
48 the methane monooxygenase (MMO) enzyme. The *pmoA* gene encoding a subunit of the  
49 membrane-bound MMO (pMMO) enzyme is present in most aerobic methanotrophs and is  
50 frequently used as a genetic marker.

51 Methanogenesis in soil typically requires anaerobic and low redox conditions, with  
52 depletion of strong electronegative terminal electron acceptors, e.g. nitrate, iron. Methanogens  
53 belong to the Euryarchaeota phylum, and produce CH<sub>4</sub> either from CO<sub>2</sub> and H<sub>2</sub>  
54 (hydrogenotrophic methanogenesis), acetate (acetoclastic methanogenesis), or methylated single-  
55 C one-carbon compounds (Thauer *et al.*, 2008). All known methanogenic pathways include the  
56 methyl-coenzyme M reductase enzyme encoding the *mcrA* gene, which is used as a genetic  
57 marker for methanogens in the environment. Most aerobic soils show little production of CH<sub>4</sub>,  
58 as evidenced by low abundance of *mcrA* genes (Hernández *et al.*, 2017). A few recent studies  
59 have shown that even water-logged soil profiles tend to have an aerobic upper layer that, via its  
60 capacity for CH<sub>4</sub> oxidation, helps mitigate CH<sub>4</sub> release to the atmosphere from lower soil depths.  
61 In some cases this layer can remove 80-97% of CH<sub>4</sub> produced at lower depths (Conrad and  
62 Rothfuss, 1991; Frenzel *et al.*, 1992; Oremland and Culbertson, 1992; Sass *et al.*, 1992). In the  
63 field, and at ecosystem spatial scales, our understanding of the drivers of soil GHG fluxes is  
64 profoundly limited.

65           Local soil and vegetation gradients provide an opportunity to explore mechanisms that  
66 regulate soil GHG fluxes (Freitag *et al.*, 2010; Krause *et al.*, 2013; Christiansen *et al.*, 2016).  
67 Soil biogeochemical conditions (e.g. microbial substrates, reduction-oxidation potential, and soil  
68 pH) can vary dramatically over relatively short distances despite more-or-less constant climate.  
69 We used a forest-grassland-bog gradient located within a sub-alpine region of southern New  
70 South Wales (Fig. 1), Australia to examine the drivers of variation in soil microbial  
71 communities, and CO<sub>2</sub> and CH<sub>4</sub> fluxes. These soils are of particular interest given their  
72 previously-observed, rapid rates of CH<sub>4</sub> oxidation in forest and grassland soils and likely  
73 biogeochemical sensitivity to climate change. Our objective was to determine the role of soil  
74 microbial communities in regulating the production/consumption of CH<sub>4</sub> across this soil-  
75 vegetation gradient.

## 76 **Results**

### 77 *Soil greenhouse gas fluxes and production at depth*

78           Surface fluxes of CO<sub>2</sub> and CH<sub>4</sub> were measured once each season. Air temperatures  
79 ranged from 3.1 to 28.3 °C, while the average soil temperature at 0-7 cm depth was 3.6 to 16.4  
80 (Table S1). Gravimetric water content on 17 February, when microbial community analyses  
81 were conducted, ranged from 0.25-0.79 for forest soils, 0.25-0.38 for grassland soils, and 0.9-  
82 4.66 g H<sub>2</sub>O g dry soil<sup>-1</sup> for bog soils (Table S2). The relative differences in soil temperature and  
83 moisture amongst soil-vegetation types during February extend to other three sampling dates  
84 (Table S1,S2).

85           Mean soil-to-atmosphere CO<sub>2</sub> fluxes (measured *in situ*) across the soils ranged from 2.5  
86 to 17.4 mg CO<sub>2</sub> m<sup>-2</sup> h<sup>-1</sup>, spring and summer respectively (Fig. 2A-D). Belowground, CO<sub>2</sub>  
87 production (measured in the laboratory) decreased with depth. CO<sub>2</sub> production was

88 predominately from top 0-5 cm of soil, with soil means ranging from 72 to 2,357  $\mu\text{g CO}_2 \text{ g}^{-1} \text{ d}^{-1}$ .  
89 Whereas at the 25-30 cm depth means ranged from 4 to 197  $\mu\text{g CO}_2 \text{ g}^{-1} \text{ d}^{-1}$ . Forest and bog soils  
90 showed significantly greater  $\text{CO}_2$  production in summer than the grassland soil at multiple  
91 depths ( $P < 0.01$ , Fig. 2E), ranging from 47 to 398% greater in forest soil or 60 to 282% greater  
92 in bog soil. Whereas, there were less pronounced differences amongst soil types in autumn,  
93 winter, and spring.

94 *In situ*  $\text{CH}_4$  fluxes ranged from -413 to +778  $\mu\text{g CH}_4 \text{ m}^{-2} \text{ h}^{-1}$  (Fig. 3A-D). Absolute  
95 fluxes, whether positive or negative, were greatest in summer compared to other seasons.  
96 Although similar pattern of soil type persisted throughout other three seasons. Forest and  
97 grassland soils mostly consumed  $\text{CH}_4$  throughout the year (Fig. 3A-D), while bog soils were net  
98 producers of  $\text{CH}_4$  in three of four seasons (Fig. 3A-C). Belowground, most soils (including bog)  
99 showed net  $\text{CH}_4$  consumption at all depths to 30 cm (Fig. 3E-H). The main exception was  
100 summer where large  $\text{CH}_4$  production of 3838  $\mu\text{g CO}_2 \text{ g}^{-1} \text{ d}^{-1}$  was found at 5-10 cm depth ( $P =$   
101 0.003), as well as moderate production of  $\text{CH}_4$  by all soils at 25-30 depth ranging from 87-704  
102  $\mu\text{g CO}_2 \text{ g}^{-1} \text{ d}^{-1}$  (Fig. 3E). The net global warming potential, measured as  $\text{CO}_2$ -equivalents,  
103 provides further evidence as the exceptional strength of the soil  $\text{CH}_4$  sink in this ecosystem  
104 (Table 1).

#### 105 *Archaeal and bacterial gene abundance (qPCR) during summer (17 February 2015)*

106 There were significant differences in archaeal 16S rRNA gene abundance between soil  
107 types, with the bog soil showing one to two orders of magnitude greater abundances than the  
108 other two soils at multiple depths ( $P < 0.060$ , Fig. 4A). The abundances of bacterial 16S rRNA  
109 genes were highly variable but did show a decrease with depth from  $2.3 \times 10^{11}$  to  $1.6 \times 10^{10}$   
110 copies per g soil (Fig. 4B). There were no significant differences in abundance of bacterial 16S

111 rRNA genes among soil types. A *pmoA* qPCR assay targeting conventional methanotrophs  
112 belonging to the families Methylococcaceae and Methylocystaceae showed highest abundance in  
113 the bog samples (Fig 4C).

114 Across the soil-vegetation gradient, GHG production at depth was positively related to  
115 the soil-to-atmosphere flux of both gases (Fig. 5A, B). There was also evidence for GHG  
116 production correlating with specific gene abundances across all soil types and depths. For  
117 example, the abundance of bacterial 16S rRNA genes was linearly, positively related to CO<sub>2</sub>  
118 production (Fig. 5C). While, the abundance of archaeal 16S rRNA was non-linearly, positively  
119 related to CH<sub>4</sub> production (3-parameter exponential equation, Fig. 5D). Interestingly, however,  
120 we did not find significant relationships between abundances of archaea and CO<sub>2</sub>, nor between  
121 bacterial abundances and CH<sub>4</sub>.

#### 122 *Microbial community composition and diversity during summer (17 February 2015)*

123 Across all soils, Illumina sequencing resulted in 440,504 archaeal, 24,293,004 bacterial,  
124 and 2,258,405 *pmoA* sequences. Both clustering and multivariate analyses (Fig. 6) show distinct  
125 differences in bacterial 16S rRNA genes between the forest/grassland and bog soils, with less  
126 forest and grassland soils being more similar. In the bog soils, *Betaproteobacteria* (OTU 1850)  
127 and OTU-1522 were more abundant than in forest and grassland soils (Fig. 6A). Contrastingly,  
128 *Rhizobiales* (OTU-78) and OTU-71 differentiated the forest/grassland from bog soils. A few  
129 OTUs were uniquely abundant in the grassland soils, like the *Chloroflexi* group (especially OTU-  
130 252, OTU-1043, OTU-249). Across multiple depths, the bog soils had greatest 16S rRNA  
131 diversity compared to the forest and grassland soils (Fig. S1). The bog soils had greater  
132 diversity, 10% and 42% larger Shannon diversity and richness (H' and S), than the average of  
133 forest and grassland soils across all depths ( $P < 0.001$ ).



134 This study focused on methanotroph identification by using Illumina sequencing, of  
135 either 16S rRNA or *pmoA* genes. Both 16S rRNA and *pmoA* gene sequence data revealed that  
136 the forest and grassland soils were dominated by USC $\alpha$  (Figs. 7, S2) - with nearly equivalent  
137 abundances between the two soil types. The highest USC $\alpha$  relative abundance approached 1% of  
138 all 16S rRNA genes, and decreased with depth. *Methylocystis* were the most abundant aerobic  
139 methanotrophs detected in the bog accounting for up to 0.3% relative abundance across all  
140 depths (Fig. 7). *Candidatus* Methylomirabilis sp., which are nitrite-dependent anaerobic  
141 methanotrophs, increased with depth in the bog to a maximum of 1.5% relative abundance at 25-  
142 30 cm depths. The Illumina sequencing of the *pmoA* gene resulted in distinct differences among  
143 all three soil types, but especially between the forest/grassland and bog soils. Using *pmoA*,  
144 USC $\alpha$  dominated methanotroph populations in forest and grassland soils, whereas *Methylocystis*  
145 dominated bog soils (Fig. S2). Greater counts of USC $\alpha$  were mostly found at the surface of just  
146 one bog site (B4). This bog site has greater slope along the soil-vegetation gradient and 80-1200  
147 % greater rock content than the other bog sites across depths (B4; Table S3, Fig 1), thus greater  
148 sand content and porosity possibly provided better habitat for methanotrophs in this bog soil.

#### 149 *Patterns in Community Composition and Relationships with Soil Properties*

150 Non-metric dimensional scaling (NMDS) shows a distinct difference in bacterial 16S  
151 rRNA genes among soil types and relationship to soil properties ( $P < 0.05$ , Fig. 6B). The  
152 communities in all soils showed a pattern with depth, but the bog soil had the most distinct  
153 separation among bacterial communities with depth. Elevated CH<sub>4</sub> production also correlated  
154 with depth of bog soils (Fig. 6B). The grassland soils were most positively related to clay content  
155 of the soils, and negatively with soil moisture – these were the driest of the three soil types (Fig.  
156 6B, Table S3). The variables arguably most related to organic matter content (dissolved organic

157 and total C and N, inorganic N, and CO<sub>2</sub> production) correlated positively with the forest soils,  
158 and the somewhat shallow bog soil depths.

159 The forest *pmoA* community was relatively tightly clustered except for one sample at 10-  
160 15 cm depth (Fig. S3A). GHG production did not correlate significantly with the *pmoA*  
161 community, indicating differences in the microbial community are not the direct cause of  
162 production at depth. The community composition of the Euryarchaeota showed differences  
163 among soil types, especially between grassland and bog soils, but no trend with depth (Fig. S3B).  
164 Both GHGs and soil properties were positively related to soil organic matter, whereas clay was  
165 negatively related to the bog Euryarchaeota community composition. In contrast, the community  
166 composition in the grass was positively associated with soil clay content. (Fig. S3B)

## 167 **Discussion**

### 168 *Soil Microbial Community Composition and Links to Greenhouse Gas Fluxes*

169 Adjacent soils, with varying soil-forming factors (especially organisms – vegetation, and  
170 landscape position) showed distinct microbial community composition and abundance with  
171 depth. The bog soils tended to have the greatest abundance of archaeal 16S rRNA genes (Fig.  
172 4A). At multiple depths, the bog soils also had greater diversity in bacterial and methanotroph  
173 communities (Fig. 4B, C). Both of these findings are most likely due to the large total organic C  
174 content in bog soils compared to the other two – when averaged across all depths, bog soils had  
175 41 and 128 % greater soil organic C than the forest and grassland soils, respectively (Table S3).  
176 The greater the available sources of energy (as approximated by total C) at the base of the food  
177 web, the larger and more diverse we might expect the microbial communities to be (Tilman *et*  
178 *al.*, 2001; Zhou *et al.*, 2002; Hartmann *et al.*, 2015).

179           The bog soils showed the greatest CH<sub>4</sub> production measured in this study at lower depths  
180 (5-10 cm, Fig. 3E), which is surprising considering that at lower depths bog soils have greater  
181 water content, i.e., likely more anoxic and methanogenic; however, this can be explained by the  
182 increasing abundance of *Candidatus Methyloirabilis* sp. with depth (Fig. 7). *Methyloirabilis*  
183 sp. are nitrite-dependent methanotrophs that oxidize CH<sub>4</sub> by the intracellular production of O<sub>2</sub>  
184 from the dismutation of NO (Ettwig *et al.*, 2010). Their presence in this habitat is consistent with  
185 previous work that suggests they are common in wetland environments (Hu *et al.*, 2014). They  
186 occur at deeper depths where nitrite is more available and exogenous O<sub>2</sub>, which is detrimental to  
187 their activity (Luesken *et al.*, 2012). In addition, methanogenesis might be stimulated at the 5-10  
188 cm depth by Sphagnum rhizoids that occur just above this depth (54%, Table S3). Therefore,  
189 high rhizodeposition at this depth could drive methanogenesis by supplying organic C for either  
190 acetoclastic or CO<sub>2</sub> reduction to CH<sub>4</sub> (Le Mer and Roger, 2001), coupled to relatively low CH<sub>4</sub>  
191 oxidation. Bog soil showed that methanogen gene expression in the top 10 cm of soil correlated  
192 linearly with the CH<sub>4</sub> flux, and methanotroph gene expression ratio was negatively correlated  
193 with CH<sub>4</sub> flux rates at a different peat bog site (Freitag *et al.*, 2010). In aggregation, microsites  
194 of CH<sub>4</sub> oxidation and CH<sub>4</sub> production, when coupled may explain the net production and strong  
195 consumption of CH<sub>4</sub> (Bender and Conrad, 1992, 1994; Von Fischer and Hedin, 2002; Yang and  
196 Silver, 2016).

197           Although not evidence of causation, patterns in soil microbial abundance and community  
198 composition were strongly related to GHG production. Given this caveat, the CO<sub>2</sub> production  
199 was best correlated with bacterial 16S rRNA abundance and CH<sub>4</sub> fluxes with archaeal 16S rRNA  
200 abundance (Fig. 5). Archaeal 16S rRNA gene abundance was best related to CH<sub>4</sub> production  
201 (Figs. 3E, 4C, 5E), and highlights the importance of archaeal methanogens in net CH<sub>4</sub>

202 production (Conrad, 2002; Angel *et al.*, 2012; Nazaries, Murrell, *et al.*, 2013; Hernández *et al.*,  
203 2017).

204 Methanotroph relative abundance declined with depth in the forest and grassland soil  
205 (Fig. 7), similar to the findings from other studies (Bender and Conrad, 1994; Kolb *et al.*, 2005).  
206 USC $\alpha$  methanotrophs are associated with high rates of atmospheric CH<sub>4</sub> oxidation in well-  
207 drained habitats lacking substantial endogenous methanogenesis (Kolb *et al.*, 2005; Chen *et al.*,  
208 2007; Bengtson *et al.*, 2009; Kolb, 2009; Shrestha *et al.*, 2012). The bog soils only showed CH<sub>4</sub>  
209 consumption at the 0-5 cm depth during the summer when soil-to-atmosphere CH<sub>4</sub> fluxes were  
210 highest (Fig. 3A, 3E), which corresponded to the soil depth the greatest proportion of USC $\alpha$  (Fig  
211 7, S2). Thus, USC $\alpha$  abundance, greater O<sub>2</sub> availability, and lower methanogenesis in the top 0-5  
212 cm all could contribute to the high capacity for aerobic CH<sub>4</sub> oxidation at the surface of bog soils.  
213 Although *Candidatus* Methylomirabilis were highly abundant at depth, their per-cell CH<sub>4</sub>  
214 oxidation capacity might be lower than for aerobic methanotrophs (Luesken *et al.*, 2012).  
215 Furthermore, the activity of *Candidatus* Methylomirabilis might have been inhibited by O<sub>2</sub>  
216 exposure during the subsectioning of the cores. Finally, although aerobic methanotrophs can  
217 survive in low O<sub>2</sub> environments, in part by energy generation via fermentation reactions  
218 (Kalyuzhnaya *et al.*, 2013; Kits *et al.*, 2015), the rates of CH<sub>4</sub> oxidation will be lower than most  
219 well-oxygenated surface soils.

220 The three soils had distinct microbial community compositions, with the forest and  
221 grassland soils being the most similar (Fig. 6, 7, S2, S3). The bog soils had greater abundances  
222 of bacterial 16S rRNA OTU in the family *Ktedonobacterales* (OTU-1522) and an unclassified  
223 *Betaproteobacteria* (OTU 1850, Fig. 6A). All soils showed a pattern with depth, but the bog  
224 soils showed the greatest discrimination with depth (Fig. 6B). Some microorganisms in the

225 *Ktedonobacterales* have been cultured, and these are Gram-positive, aerobic, broad temperature  
226 ranges (meso- to thermophilic), and are characterized by having multicellular filaments and  
227 spores – similar to actinomycetes (Yokota, 2012; Yabe *et al.*, 2017). The unclassified  
228 *Betaproteobacteria* are likely ammonia-oxidizing bacteria and did not play a significant role in  
229 CH<sub>4</sub> oxidation (Bodelier and Frenzel, 1999). The forest soils showed greater abundance of an  
230 unclassified *Gammaproteobacteria*, which could potentially be either methanotrophic or  
231 ammonia-oxidizing bacteria.

232         Within the methanotroph community, the bog soils showed a distinctly greater abundance  
233 of *Methylocystis* spp., *Ca. Methyloirabilis*, and unclassified proteobacterial methanotrophs (Fig  
234 7 and S2). *Methylocystis* typically proliferate at CH<sub>4</sub> concentrations > 40ppm, which would  
235 occur in bog soils where concentrations (and production) of CH<sub>4</sub> are greatest. A recent study  
236 showed this is indeed the case where low-affinity methanotroph activity is dependent on high  
237 supply of CH<sub>4</sub>, and may trigger high-affinity activity during drought (Cai *et al.*, 2016). The  
238 grassland and forest soils were predominately composed of *Methylocystis* and USC $\alpha$  (Fig 7 and  
239 S2). The USC $\alpha$ , are classified as high-affinity, with apparent K<sub>m</sub> values of 0.01-0.28, compared  
240 to that of 0.8-32 for low-affinity methanotrophs (Shukla *et al.*, 2013). Several studies now  
241 confirm that forest or grassland soils that have high CH<sub>4</sub> oxidation potential also have high  
242 abundance of *Methylocystis* or USC $\alpha$  methanotrophs (Knief *et al.*, 2003; Malghani *et al.*, 2016).  
243 There is mounting evidence, including this study, that indicate the absence/presence of specific  
244 methanotrophic bacteria or methanotrophic community composition might be just as important  
245 as physicochemical regulators on net CH<sub>4</sub> fluxes from soils (Nazaries *et al.*, 2011; Nazaries, Pan,  
246 *et al.*, 2013; Malghani *et al.*, 2016). Other studies show CH<sub>4</sub> fluxes are largely regulated by  
247 physical processes such as substrate diffusion (Saari *et al.*, 1997; Wille *et al.*, 2008; Fest *et al.*,

248 2015; D'imperio *et al.*, 2017) or labile C supply (Pratscher *et al.*, 2011; Sullivan *et al.*, 2013);  
249 however, due to the high sensitivity of methanotrophic bacteria to physicochemical conditions it  
250 is difficult to tease these factors apart (Nazaries *et al.*, 2011; Fest *et al.*, 2015).

251 Our study and others (Conrad and Rothfuss, 1991; Frenzel *et al.*, 1992) show that surface  
252 soils even in consistently wet soils (0-5 cm, Fig. 3) can be a sink not only for atmospheric CH<sub>4</sub>,  
253 but also a likely filter for CH<sub>4</sub> produced at greater depths (Cai *et al.*, 2016). Given that by some  
254 estimates as much as 80-97% of endogenously produced CH<sub>4</sub> at depth is consumed before  
255 reaching the atmosphere (Conrad and Rothfuss, 1991; Frenzel *et al.*, 1992; Oremland and  
256 Culbertson, 1992; Sass *et al.*, 1992), the disturbance of this thin layer of soil could result in  
257 larger net CH<sub>4</sub> fluxes as CH<sub>4</sub> produced at depth diffuses toward the atmosphere and is not  
258 oxidized in this surface layer. The complex dynamics, high net CH<sub>4</sub> uptake rates of the forest  
259 and grassland soils (Fig. 9A), and high consumption at the surface of the bog soils are all reasons  
260 why it is crucial to understand the microbial mechanisms driving these greenhouse gas fluxes.

261

### 262 *Australian Alps: Unique Soils with Disproportionate CH<sub>4</sub> Sink Strength*

263 Across the globe, aerated upland soils provide a net CH<sub>4</sub> sink that ranges from 7-100 Tg  
264 y<sup>-1</sup> (Smith *et al.*, 2000), which is estimated to be up to 15% of the total global CH<sub>4</sub> sink  
265 (Reeburgh, 2003; Dutaur and Verchot, 2007; Shukla *et al.*, 2013). The Australian Alps are  
266 restricted to the southeastern corner of the mainland totaling 0.16% of Australia's area (Fig. 8).  
267 We studied 538 ha of a 1.2M ha region, but found convincing evidence for the overwhelming  
268 CH<sub>4</sub> sink strength of this region's soils (Fig. 9A).

269 We used a combination of foliar coverage estimates for extrapolation across the region,  
270 climate station data to interpolate CH<sub>4</sub> fluxes between seasonal measurements, and range in  
271 global sink strength from the literature (Table 2), to parameterize the disproportionate  
272 contribution of this endemic ecosystem to the global soil CH<sub>4</sub> sink. While only comprising  
273 <0.03% of global forested and grassland ecosystems, this unique Australian ecosystem could  
274 represent 6 up to >100% of global soil methane sink (Kirschke *et al.*, 2013; Sauniois *et al.*, 2016).  
275 While it is unreasonable to expect these unique soils to make up more than 100% of the global  
276 CH<sub>4</sub> sink, it illustrates the problem with the low estimates for the global soil CH<sub>4</sub> sink (Kirschke  
277 *et al.*, 2013; Sauniois *et al.*, 2016; Gatica *et al.*, 2020). These soils are undoubtedly amongst the  
278 greatest negative CH<sub>4</sub> fluxes observed at an hourly scale (Fig. 9A), and our data conform to  
279 other annual CH<sub>4</sub> flux estimates despite the acknowledged error of these estimates with so few  
280 observations (Gatica *et al.*, 2020; Fig. 9B). Monitoring CH<sub>4</sub> fluxes at high spatial and temporal  
281 resolution in remote locations remains a major challenge.

282 Soils under all three vegetation types were sources of CO<sub>2</sub> with positive GWPs, yet  
283 ranged from strong negative to positive GWP contributions from CH<sub>4</sub> (Table 1). The CH<sub>4</sub> sink  
284 under grassland and forest soils provided 53% and 56% GWP offset (in negative CO<sub>2</sub>-  
285 equivalents) of the net CO<sub>2</sub> emissions respectively. All soils consumed CH<sub>4</sub> at 0-5 cm depth.  
286 This is consistent with other studies showing high uptake in surface soils where O<sub>2</sub> is more  
287 available (Koschorreck and Conrad, 1993; Bender and Conrad, 1994; Hütsch, 1998), even lake  
288 sediments can show similar CH<sub>4</sub> oxidation profiles with depth (He *et al.*, 2012). However, many  
289 studies find maximum oxidation rates are not near the soil surface, but 5-10 cm below (Bender  
290 and Conrad, 1994; Hütsch *et al.*, 1994; Schnell and King, 1994; Priemé and Christensen, 1997;  
291 Wolf *et al.*, 2012). Differences in where this maximum CH<sub>4</sub> consumption depth occurring are

292 dependent on soil texture, organic matter content, and moisture content with depth along with  
293 substrates that are also thought to regulate CH<sub>4</sub> oxidation like labile C or inorganic N that are  
294 also more available in surface soils (Priemé and Christensen, 1997; Pratscher *et al.*, 2011;  
295 Sullivan *et al.*, 2013).

296 This endemic ecosystem, with an arguably disproportionate importance to the global soil  
297 CH<sub>4</sub> sink (Tables 1,2; Fig. 8), are amongst the ecosystems most likely to be affected by changes  
298 in climate, as was recently demonstrated by declines in CH<sub>4</sub> uptake in several long-term studies  
299 of forest soils (Ni and Groffman, 2018). More frequent and intense forest fires are just one  
300 global change threat to these Australian Alps soils (Adams, 2013; Adams *et al.*, 2013), with  
301 potential positive feedbacks to climate change. We are increasingly reliant on key soil  
302 ecosystem services to thrive on planet Earth (Jónsson and Davíðsdóttir, 2016), and  
303 agroecosystem soils get much of the attention due to proximal benefits (i.e. crop production).  
304 Global soil ecosystem services, however, like that of strong atmospheric CH<sub>4</sub> oxidation  
305 occurring in these Australian Alps soils, are not as obvious nor as easy to value but critical for  
306 buffering against anthropogenic climate change.

307

## 308 **Experimental Procedures**

### 309 *Study Site Characteristics*

310 Our study sites were located in an area known locally as the Snowy Plains, within the  
311 Snowy Mountains region of southern New South Wales. The Snowy Plains are form part of the  
312 Australian Alps montane grasslands, and lie adjacent to the Kosciuszko National Park (36°10' S,  
313 148°54 'E; Fig. 1). The elevation range of the sampling area within the Snowy Plains was 1471



314 to 1677 masl. The mean annual temperature and precipitation are 6.4 °C and ~1600 mm (SILO -  
315 Queensland Government). The site remains snow-covered typically for 2-3 months of the year.

316 The area is a mosaic ecosystem containing a mixture of bog, grassland, and forest (Fig. 1)  
317 and has been well described elsewhere (e.g. Jenkins and Adams, 2010). Alpine humus soils  
318 (Chernic tenosol) in the region are ~400 million years old and derived from glacial moraines of  
319 Silurian Mowomba granodiorite (Costin *et al.*, 1952). They show little horizon development in  
320 the top 30 cm (Fig. S4). Soil are mostly sandy loams in texture, and pH ranges from ~5.3-5.7  
321 down to 30 cm, across all sites (Table S3). Bogs are dominated by *Sphagnum spp.* and some  
322 sparse grass cover (*Poa spp.*). Grasslands are dominated mostly by *Poa hiemata* and *Poa*  
323 *costiniana*. Forests are dominated by Snow Gums (*Eucalyptus pauciflora*), with the N-fixing  
324 shrub *Bossiaea foliosa*, and some *Poa spp.* as understory and ground layers.

### 325 *Experimental Design, Soil Sampling, and Gas Sampling*

326 We used four topographic transects (from bogs and grasslands in the lowest part of the  
327 landscape, to forests in upland areas) to guide our soil and GHG sampling (Fig. 1). After each  
328 sampling location was determined, a 15-cm diameter (5-cm deep) PVC collar was installed for  
329 soil GHG sampling a minimum of 1 month prior to sampling, in order to preclude artifacts  
330 introduced by recent disturbance. We measured greenhouse gas fluxes *in situ* and collected soils  
331 on 17 February, 25 May, 22 September, and 23 November in 2015. But in-depth microbial  
332 sampling and analyses were conducted only on soils collected on 17 February – the time of year  
333 for peak CH<sub>4</sub> production and consumption.

334 GHG fluxes were measured *in situ* using the static chamber method. We first placed a  
335 3.2 L, vented, PVC chamber over the collar. Four gas samples were collected every 10-15  
336 minutes and directly injected into a Labco Exetainer vial. Concurrent measurements of soil

337 moisture (Theta Probe, Delta-T Devices Theta Probe, Cambridge, UK) and temperature (Novel  
338 Ways, Hamilton, NZ) were taken in triplicate and averaged for each measurement location (7 cm  
339 depth).

340 Immediately after completing gas sampling, the chambers were removed, and a 5-cm  
341 diameter 30-cm deep soil core was taken directly in the center of the collar. These cores were  
342 used for determination of soil properties, microbial community analyses, and to measure net CO<sub>2</sub>  
343 production and CH<sub>4</sub> production/consumption in the laboratory. The 30-cm soil cores were  
344 stratified and dissected in the field with a clean knife at 5-cm intervals. At each depth, a  
345 subsample (~ 3-5 g of soil) was immediately placed into a 2-ml Eppendorf tube, then placed in  
346 liquid nitrogen and stored at -80 °C until DNA was extracted. The remainder of the soil core  
347 was placed in a protective PVC sleeve, and then stored in an iced cooler until reaching the  
348 laboratory.

349 Soil cores from the field were transferred to 1 L jars where they were briefly incubated at  
350 near-ambient air temperature at the time of collection (22 °C) in order to further characterize  
351 CO<sub>2</sub> and CH<sub>4</sub> production and consumption occurring at each depth (*sensu* Bender and Conrad,  
352 1994). This procedure has been found to be highly related ( $r^2 = 0.44$ ,  $n = 30$ ) to *in situ* CH<sub>4</sub>  
353 production/consumption (Priemé and Christensen, 1997). The incubations began by placing the  
354 relatively undisturbed soil cores into the jars, flushing them with ambient air, and then placing  
355 the lids on the jars. The lids had Luer-lock access, and four gas samples were taken over the  
356 short-term (3-day) incubations and placed directly into Labco Exetainer vials. Once the  
357 incubations finished, the soils were air dried for physical and chemical analyses. The GHG  
358 concentrations were analyzed on a gas chromatograph.

359 *Soil Processing and Analyses*

360           Soils were sieved (2 mm) and both rocks and roots were removed and weighed. A sub-  
361 sample was ground for total C and N analysis on a TruSpec Elemental Analyzer (LECO, St.  
362 Joseph, MI, USA). Soil texture was analyzed by using the hydrometer method (Gee and Bauder,  
363 1986). Soil inorganic N (ammonium and nitrate) was measured by extracting 5 g of soil with 40  
364 ml of 0.5 M K<sub>2</sub>SO<sub>4</sub> shaken for 1 h and filtered with Whatman #1. These extracts were analyzed  
365 on a Lachat Injection-flow Analyzer according to standard methods (Lachat Instruments,  
366 Loveland, CO, USA). Dissolved organic C and N were analyzed on the same extracts on a  
367 Shimadzu TOC-N Analyzer (Shimadzu Scientific Instruments Inc., Columbia, MD, USA).  
368 Electrical conductivity and pH were measured on SevenMulti probe (MettlerToledo, Columbus,  
369 OH, USA) with a 1:1 (w:w) ratio with de-ionized water. Heavy elements were analyzed by X-  
370 ray fluorescence using a Niton XL3 t Ultra Analyzer meter (Thermo Scientific, Waltham, MA,  
371 USA).

372 *DNA Extraction and Quantitative PCR*

373           Total DNA was extracted using the NucleoSpin<sup>®</sup> Soil kit (Macherey-Nagel, Germany) by  
374 disrupting the cells by bead beating (30 s at 5.5 m s<sup>-1</sup>). DNA purity and quantification were  
375 determined using a NanoDrop<sup>®</sup> Spectrophotometer ND-1000 (Thermo Fisher Scientific, USA).  
376 DNA at a concentration of 10 ng μl<sup>-1</sup> was stored at -20 °C for further molecular analysis. The  
377 abundance of bacterial- and archaeal- 16S rRNA genes as well as *pmoA* genes was performed  
378 using an iCycler Instrument (BioRad). For all assays, standards containing known number of  
379 DNA copies of the target gene were used. qPCR conditions for archaeal- and bacterial- 16S  
380 rRNA genes were based on dual-labeled probes. For bacterial 16S rRNA genes, primers  
381 Bac338F, Bac805R and Bac516P were used. For archaeal 16S rRNA genes, primers Arc 787F,

382 Arc1059R and Arc915P were used. Conditions for both genes were as follows: 0.5  $\mu$ M of each  
383 primer, 0.2  $\mu$ M of the dual-labeled probe, 3  $\mu$ l of template, 4 mM MgCl<sub>2</sub> (Sigma) and 12.5  $\mu$ l of  
384 JumpStart Ready Mix (Sigma-Aldrich). 1  $\mu$ l of BSA (0.8  $\mu$ g/ $\mu$ l) was added to archaeal 16S  
385 rRNA gene reactions. The program used for both assays was 94 °C for 5 min, 35 cycles of 95 °C  
386 for 30 s and 62 °C for 60 s extension and signal reading (Yu *et al.*, 2005). qPCR condition for  
387 *pmoA* genes was using SYBR Green (Sigma-Aldrich) and primers A189F / mb661R. PCR  
388 conditions were 0.667  $\mu$ M of each primer, 3  $\mu$ l template, 4 mM MgCl<sub>2</sub> (Sigma), 0.25  $\mu$ l FITC  
389 (1:1000), 12.5  $\mu$ l of SYBR Green JumpStart *Taq* Ready Mix (Sigma-Aldrich) and 0.6  $\mu$ l of BSA  
390 (0.5  $\mu$ g/ $\mu$ l). PCR program was 94 °C for 6 min, followed by 45 cycles of 94 °C for 25 s, 65.5 °C  
391 20 s, 72°C 35s, 72°C 10 s plate read. The final melting curve was as follows: 100 cycles of 75-  
392 94.8°C 6s, +0.2 °C cycle<sup>-1</sup> (Kolb *et al.*, 2003). Efficiencies of 99.6% for bacterial 16S rRNA  
393 genes, 78.8 – 84.9% for archaeal 16S rRNA genes, and 77.2 – 78.5% for *pmoA* genes were  
394 obtained, all with R<sup>2</sup> values > 0.99. Technical duplicates were performed for each of the  
395 replicates.

#### 396 *Illumina library preparation and sequencing*

397 MiSeq Illumina sequencing was performed for total 16S rRNA and *pmoA* genes. PCR  
398 primers 515F / 806R targeting the V4 region of the 16S rRNA gene (approximately 250  
399 nucleotides) were used (Bates *et al.*, 2011) with an initial denaturation at 94 °C for 5 min,  
400 followed by 28 cycles of 94 °C for 30 s, 50 °C for 30 s, and 68 °C for 30 s and a final elongation  
401 at 68 °C for 10 min (Hernández *et al.*, 2015). The amplification of *pmoA* genes was performed  
402 via a semi-nested PCR approach using the primers A189F/A682R for the first round PCR  
403 (Holmes *et al.*, 1995) as follows: 94 °C for 3 min followed by 30 cycles of 94 °C 45 s, 62 to 52  
404 °C (touchdown 1 °C per cycle) for 60 s, 68 °C 3 min, and a final elongation of 68 °C 10 min

405 (Horz *et al.*, 2005). Aliquots of the first round of PCR (0.5 µl) were used as the template in the  
406 second round of PCR using the primers A189f / A650r / mb661r in a multiplex PCR as follows:  
407 94 °C for 3 min followed by 25 cycles of 94 °C 45 s, 56 °C 60 s and 68°C 1 min, and final  
408 elongation of 68 °C 10 min (Horz *et al.*, 2005). Individual PCRs contained a 6-bp molecular  
409 barcode integrated in the forward primer. Amplicons were purified using a PCR cleanup kit  
410 (Sigma) and quantified using a Qubit 2.0 fluorometer (Invitrogen). An equimolar concentration  
411 of the samples was pooled for each of the genes and sequenced on separate runs using 2 x 300 bp  
412 MiSeq paired-end protocol. Library preparation and sequencing was performed at the Max  
413 Planck Genome Centre (MPGC), Cologne, Germany. Table S4 summarizes primer sequences for  
414 both genes and barcode sequences for each of the samples.

#### 415 *Bioinformatics, Data processing, GIS modeling, and Statistical Analyses*

416 For 16S rRNA genes, quality filtering and trimming forward and reverse adaptors from  
417 the sequences was carried out using the tool cutadapt (Martin, 2011). Forward and reverse reads  
418 were merged using the usearch fastq\_mergepairs command (Edgar, 2013). For the *pmoA* gene,  
419 one-end run was performed, and the forward adaptor was trimmed using cutadapt. Downstream  
420 processing was performed with UPARSE (Edgar, 2013) and UCHIME pipelines (Edgar *et al.*,  
421 2011) following the steps detailed in Reim *et al.* (Reim *et al.*, 2017). For 16S rRNA genes, a  
422 representative sequence of each operational taxonomic unit (OTU) was classified based on the  
423 SILVA-132 16S rRNA gene database using the naïve Bayesian classifier (bootstrap confidence  
424 threshold of 80%) in mothur (Schloss *et al.*, 2009). The *pmoA* genes were classified using the  
425 same method, but using the *pmoA* database (Dumont *et al.*, 2014). Sequence data were deposited  
426 in the NCBI Sequence Read Archive (SRA) under accession number PRJNA384296.

427           A USC $\alpha$  16S rRNA gene sequence has recently been identified (Pratscher *et al.*, 2018),  
428           which enabled us to search these sequences in our dataset. The 16S rRNA genes were identified  
429           by standalone BLAST against the 16S rRNA OTUs using the USC $\alpha$ \_MF sequence (Genbank ID  
430           MG203879). Those OTUs with percent ID > 98% relative to the USC $\alpha$ \_MF were positively  
431           identified as USC $\alpha$ . The relative abundance of USC $\alpha$  in each of the samples could then be  
432           calculated from the OTU table.

433           Greenhouse gas fluxes (both field and incubation) were calculated using a linear  
434           regression, or change in the GHG over the time between gas samples. Data was screened for  
435           normality and heterogeneity of variances, and when not conforming was log-transformed (Zuur  
436           *et al.*, 2010) for statistical analyses (all CO<sub>2</sub> and gene abundance data). All univariate statistics  
437           were conducted in SAS (v. 9.4). Comparisons of variance among soil/vegetation types (bog,  
438           grassland, forest) were completed using 1-way ANOVA ( $\alpha = 0.05$ ) with transect considered  
439           random, and depth not included in interactions since depth effects are not independent. Post-hoc  
440           tests were completed using lsmeans, adjusted using Tukey's for multiple comparisons.  
441           Multivariate statistics for 16S rRNA Illumina data was analyzed by using the vegan package  
442           (Oksanen *et al.*, 2016) in R software version 3.0.1 (R Core Team, 2018). Non-metric  
443           multidimensional scaling (NMDS) was performed using the *decostand* function for ordination of  
444           Hellinger distances. Influence of environmental variables on the total diversity of 16S rRNA and  
445           *pmoA* genes was analyzed by the *envfit* function (vegan package in R, permutations = 999).  
446           Heatmaps were constructed with the *gplots* package (Warnes *et al.*, 2015). Principal components  
447           analysis (PCA) of the Hellinger transformed data was performed using the *prcomp* function. The  
448           OTUs explaining most of the differences between samples were defined as the 10 OTUs  
449           contributing the largest absolute loadings in the first and second dimensions of the PCA,

450 obtained from the rotation output file (Hernández *et al.*, 2017). Hierarchical clustering of the  
451 distance matrix used the “ward.D2” method and *hclust* function. The heatmap was constructed  
452 using the *heatmap.2* function in *ggplots* package (Hernández *et al.*, 2017).

453         Using the four field-measured, hourly CH<sub>4</sub> fluxes we developed a model to estimate  
454 annual CH<sub>4</sub> production across the Australian Alps based on number of geographic information  
455 system (GIS) datasets. The datasets included elevation and aspect (30 m pixel) as well as daily  
456 estimates of maximum and minimum air temperature (BOM, 2020) and soil moisture (0 – 0.1 m;  
457 Frost *et al.*, 2018). The climate data rasters were all a 5 km pixel size. For each of the days for  
458 that CH<sub>4</sub> fluxes were determined in the field, the location of 12 sites was used to extract data  
459 from each of the raster datasets using ArcGIS (V10.8, ESRI Systems, CA). This data was then  
460 used to develop a linear regression model using R (v 4.0.2). The final linear regression model (p-  
461 value = <0.0001, F-statistic = 14.95, adjusted r<sup>2</sup> = 0.77) included the main factors (the ecosystem  
462 measured; Bog, Forest & Grassland) along soil moisture and maximum air temperature and  
463 interactions. The spatial extent of each ecosystem across the Australian Alps bioregion (IBRA7,  
464 2012) was based on tree cover in 2015 (DEE, 2018); Forest sites were located in >20% projected  
465 foliage cover and Grassland sites <20% projected foliage cover and the Bog sites were  
466 considered to be within 1 m of a hydrological flow surface developed using the TauDEM  
467 ArcGIS toolset (v5.3.7; Tarboton, 2005). This data along with average seasonal estimates of  
468 maximum air temperature and soil moisture were then computed for the Australian Alps. In  
469 small number of cases, individual pixels of the maximum air temperature and soil moisture  
470 rasters exceeded the maximum/minimum points on which the linear regression model had been  
471 developed, in which case they were forced to the maximum/minimum value. The linear

472 regression previously developed was then used to predict seasonal estimate of CH<sub>4</sub> fluxes for  
473 each of the ecosystems measured across the Australian Alps.

474

#### 475 **Acknowledgements**

476 Funding for this research was provided by an anonymous donor. Prof. Dr. Ralf Conrad,  
477 at the Max Planck Institute in Marburg, Germany, provided facilities and advice. We would like  
478 to kindly thank Barry Aitchison, whom provided us with site access and a wonderful cabin to  
479 spend the evenings around the fire. Hero Tahai assisted with laboratory procedures.

480



481 **Table legends**

482 **Table 1.** Annual estimates (mean, standard error, and range) for net ecosystem flux of carbon

483 dioxide and methane

484 **Table 2.** Comparison of Global and Australian Alps soil methane sink estimates

485

486 **Figure legends**

487 **Figure 1.** A) Location of 548 ha experiment area (inset of Australia), sampling sites within area  
488 and nearby streams. B) Landscape-level photograph of the vegetation gradient from sphagnum-  
489 dominated bog in foreground to eucalyptus-dominated forest in background. Abbreviations are  
490 F = Forest, G = Grassland, and B = Bog. The numbers after the letter represent which transect  
491 the sampling location belongs to.

492 **Figure 2.** Soil CO<sub>2</sub> fluxes (top panels, A-D) and production (bottom panels, E-H). Surface flux  
493 measurements and soils collected for production on 17 February (Summer, A & E), 25 May  
494 (Autumn, B & F), 22 September (Winter, C & G), and 23 November (Spring, D & H) in 2015.  
495 Mean and standard error shown (n = 4).

496 **Figure 3.** Soil CH<sub>4</sub> fluxes (top panels, A-D) and production/consumption (bottom panels, E-H).  
497 Surface flux measurements and soils collected for production on 17 February (Summer, A & E),  
498 25 May (Autumn, B & F), 22 September (Winter, C & G), and 23 November (Spring, D & H) in  
499 2015. Mean and standard error shown (n = 4).

500 **Figure 4.** Abundance of archaeal (A) and bacterial (B) 16S rRNA genes, and pmoA (C). Means  
501 and standard error are shown (n=4) for all samples.

502 **Figure 5.** Regressions between total CO<sub>2</sub> production and CO<sub>2</sub> soil-atmosphere flux (A), CH<sub>4</sub>  
503 production and CH<sub>4</sub> soil-atmosphere flux (B). Total GHG production was calculated for each  
504 soil profile as sum of production from 0 to 30 cm depth. Regressions between bacterial 16S  
505 rRNA abundance with CO<sub>2</sub> production (C, linear equation with log, log scale). Regression  
506 between and archaeal 16S rRNA and CH<sub>4</sub> production (D, 3-parameter exponential, log x-axis).  
507 Equations, chosen by best fit, are shown in each panel.

508 **Figure 6.** A) Heatmap of the most relevant OTUs derived from bacterial 16S rRNA genes. The  
509 samples and OTUs were clustered according to Euclidean distances between all Hellinger  
510 transformed data. The taxonomy of OTUs was determined using the Sina classifier. The colored  
511 scale gives the percentage abundance of OTUs. B) NMDS ordination of bacterial 16S rRNA  
512 communities based on the Bray–Curtis dissimilarity of community composition (stress =0.061).  
513 Arrows indicate the direction at which the environmental vectors fit the best (using the envfit  
514 function) onto the NMDS ordination space. EC, electrical conductivity; DOC, dissolved organic  
515 carbon; DON, dissolved organic nitrogen; GWC, gravimetric water content.

516 **Figure 7.** Relative abundance of 16S rRNA genes of the dominant methanotroph groups detected  
517 in the forest (A), grass (B), and bog (C) sites. USC $\alpha$  was identified by blast as described in the  
518 methods. Methylocystis and Methyloirabilis were identified based on the Silva classifications.  
519 Other methanotrophs include Methylomonas and Methylospira.

520 **Figure 8.** Areal coverage of Australian Alps in southeastern Australia (1.2M ha).

521 **Figure 9.** A) Hourly methane (CH<sub>4</sub>) fluxes from this study's Forest, Grassland and Bog soils  
522 compared to Forest and Herbaceous studies from a global meta-analysis (McDaniel et al. 2019).  
523 10<sup>th</sup> and 90<sup>th</sup> percentile shown by bottom and top whisker. 25<sup>th</sup> and 75<sup>th</sup> percentile shown by  
524 bottom and top of the box. Median is shown by the thin line, mean by the thick line, and outliers  
525 are circles. The number of measurements within each boxplot are shown in parentheses. Gray  
526 bar at -571  $\mu\text{g CH}_4 \text{ m}^{-2} \text{ h}^{-1}$  is the greatest CH<sub>4</sub> oxidation rate (most negative flux) ever observed  
527 and published (Singh *et al.*, 1997). B) Figure from survey of global forest CH<sub>4</sub> fluxes (Gatica *et*  
528 *al.*, 2020) with our modeled annual mean net CH<sub>4</sub> sink from Australian Alps and range created  $\pm$   
529 relative standard deviation from ecosystem means (Table 2).

530 **REFERENCES**

531 Adams, M.A. (2013) Mega-fires, tipping points and ecosystem services: Managing forests and  
532 woodlands in an uncertain future. *For Ecol Manage* **294**: 250–261.

533 Adams, M.A., Cunningham, S.C., and Taranto, M.T. (2013) A critical review of the science  
534 underpinning fire management in the high altitude ecosystems of south-eastern Australia.  
535 *For Ecol Manage* **294**: 225–237.

536 Angel, R., Claus, P., and Conrad, R. (2012) Methanogenic archaea are globally ubiquitous in  
537 aerated soils and become active under wet anoxic conditions. *ISME J* **6**: 847–862.

538 Bates, S.T., Cropsey, G.W.G., Caporaso, J.G., Knight, R., and Fierer, N. (2011) Bacterial  
539 communities associated with the lichen symbiosis. *Appl Environ Microbiol* **77**: 1309–1314.

540 Bender, M. and Conrad, R. (1992) Kinetics of CH<sub>4</sub> oxidation in oxic soils exposed to ambient air  
541 or high CH<sub>4</sub> mixing ratios. *FEMS Microbiol Lett* **101**: 261–269.

542 Bender, M. and Conrad, R. (1994) Methane oxidation activity in various soils and freshwater  
543 sediments: Occurrence, characteristics, vertical profiles, and distribution on grain size  
544 fractions. *J Geophys Res Atmos* **99**: 16531–16540.

545 Bengtson, P., Basiliko, N., Dumont, M.G., Hills, M., Murrell, J.C., Roy, R., and Grayston, S.J.  
546 (2009) Links between methanotroph community composition and CH<sub>4</sub> oxidation in a pine  
547 forest soil. *FEMS Microbiol Ecol* **70**: 356–366.

548 Bodelier, P.L.E. and Frenzel, P. (1999) Contribution of methanotrophic and nitrifying bacteria to  
549 CH<sub>4</sub> and NH<sub>4</sub><sup>+</sup> oxidation in the rhizosphere of rice plants as determined by new methods  
550 of discrimination. *Appl Environ Microbiol* **65**: 1826–1833.

- 551 BOM (2020) Bureau of Meteorology. Maps. Recent and Past Conditions.
- 552 Cai, Y., Zheng, Y., Bodelier, P.L.E., Conrad, R., and Jia, Z. (2016) Conventional methanotrophs  
553 are responsible for atmospheric methane oxidation in paddy soils. *Nat Commun* **7**..
- 554 Chen, Y., Dumont, M.G., Cébron, A., and Murrell, J.C. (2007) Identification of active  
555 methanotrophs in a landfill cover soil through detection of expression of 16S rRNA and  
556 functional genes. *Environ Microbiol* **9**: 2855–2869.
- 557 Christiansen, J.R., Levy-Booth, D., Prescott, C.E., and Grayston, S.J. (2016) Microbial and  
558 Environmental Controls of Methane Fluxes Along a Soil Moisture Gradient in a Pacific  
559 Coastal Temperate Rainforest. *Ecosystems* **19**: 1255–1270.
- 560 Conrad, R. (2002) Control of microbial methane production in wetland rice fields. *Nutr Cycl*  
561 *Agroecosystems* **64**: 59–69.
- 562 Conrad, R. and Rothfuss, F. (1991) Methane oxidation in the soil surface layer of a flooded rice  
563 field and the effect of ammonium. *Biol Fertil Soils* **12**: 28–32.
- 564 Costin, A.B., Hallsworth, E.G., and Woof, M. (1952) Studies in pedogenesis in New South  
565 Wales. *J Soil Sci* **3**: 190–218.
- 566 D’imperio, L., Nielsen, C.S., Westergaard-Nielsen, A., Michelsen, A., and Elberling, B. (2017)  
567 Methane oxidation in contrasting soil types: responses to experimental warming with  
568 implication for landscape-integrated CH<sub>4</sub> budget. *Glob Chang Biol* **23**: 966–976.
- 569 DEE (2018) Department of Energy and Environment. Woody Cover National Forest and Sparse  
570 Woody Vegetation Data (Version 3).
- 571 Dumont, M.G., McGenity, T.J., Timmis, K.N., and Nogales, B. (2014) Primers: functional

- 572 marker genes for methylotrophs and methanotrophs. *Hydrocarb Lipid Microbiol Protoc eds*  
573 *McGenity TJ, Timmis KN, Nogales B, Ed Springer-Verlag* 1–21.
- 574 Dutaur, L. and Verchot, L. V (2007) A global inventory of the soil CH<sub>4</sub> sink. *Global*  
575 *Biogeochem Cycles* **21**: 1–9.
- 576 Ebrahimi, A. and Or, D. (2016) Microbial community dynamics in soil aggregates shape  
577 biogeochemical gas fluxes from soil profiles – upscaling an aggregate biophysical model.  
578 *Glob Chang Biol* **22**: 3141–3156.
- 579 Edgar, R.C. (2013) UPARSE: highly accurate OTU sequences from microbial amplicon reads.  
580 *Nat Methods* **10**: 996.
- 581 Edgar, R.C., Haas, B.J., Clemente, J.C., Quince, C., and Knight, R. (2011) UCHIME improves  
582 sensitivity and speed of chimera detection. *Bioinformatics* **27**: 2194–2200.
- 583 Ettwig, K.F., Butler, M.K., Le Paslier, D., Pelletier, E., Mangenot, S., Kuypers, M.M.M., et al.  
584 (2010) Nitrite-driven anaerobic methane oxidation by oxygenic bacteria. *Nature* **464**: 543–  
585 548.
- 586 Fest, B., Wardlaw, T., Livesley, S.J., Duff, T.J., and Arndt, S.K. (2015) Changes in soil moisture  
587 drive soil methane uptake along a fire regeneration chronosequence in a eucalypt forest  
588 landscape. *Glob Chang Biol* **21**: 4250–4264.
- 589 Von Fischer, J.C. and Hedin, L.O. (2002) Separating methane production and consumption with  
590 a field-based isotope pool dilution technique. *Global Biogeochem Cycles* **16**: 1–13.
- 591 Freitag, T.E., Toet, S., Ineson, P., and Prosser, J.I. (2010) Links between methane flux and  
592 transcriptional activities of methanogens and methane oxidizers in a blanket peat bog.

- 593 *FEMS Microbiol Ecol* **73**: 157–165.
- 594 Frenzel, P., Rothfuss, F., and Conrad, R. (1992) Oxygen profiles and methane turnover in a  
595 flooded rice microcosm. *Biol Fertil Soils* **14**: 84–89.
- 596 Frost, A.J., Ramchurn, A., and Smith, A. (2018) The Australian Landscape Water Balance  
597 model.
- 598 Gatica, G., Fernández, M.E., Juliarena, M.P., and Gyenge, J. (2020) Environmental and  
599 anthropogenic drivers of soil methane fluxes in forests: Global patterns and among-biomes  
600 differences. *Glob Chang Biol* **26**: 6604–6615.
- 601 Gee, G.W. and Bauder, J.W. (1986) Particle-size analysis. In *Methods of soil analysis: Part 1—*  
602 *Physical and mineralogical methods*. Soil Science Society of America, American Society of  
603 Agronomy, pp. 383–411.
- 604 Harriss, R.C., Sebacher, D.I., and Day, F.P. (1982) Methane flux in the Great Dismal Swamp.  
605 *Nature* **297**: 673–674.
- 606 Hartmann, M., Frey, B., Mayer, J., Mäder, P., and Widmer, F. (2015) Distinct soil microbial  
607 diversity under long-term organic and conventional farming. *ISME J* **9**: 1177–1194.
- 608 He, R., Wooller, M.J., Pohlman, J.W., Quensen, J., Tiedje, J.M., and Leigh, M.B. (2012)  
609 Diversity of active aerobic methanotrophs along depth profiles of arctic and subarctic lake  
610 water column and sediments. *ISME J* **6**: 1937–1948.
- 611 Hernández, M., Conrad, R., Klose, M., Ma, K., and Lu, Y. (2017) Structure and function of  
612 methanogenic microbial communities in soils from flooded rice and upland soybean fields  
613 from Sanjiang plain, NE China. *Soil Biol Biochem* **105**: 81–91.

- 614 Hernández, M., Dumont, M.G., Yuan, Q., and Conrad, R. (2015) Different bacterial populations  
615 associated with the roots and rhizosphere of rice incorporate plant-derived carbon. *Appl*  
616 *Environ Microbiol* **81**: 2244–2253.
- 617 Holmes, A.J., Costello, A., Lidstrom, M.E., and Murrell, J.C. (1995) Evidence that participate  
618 methane monooxygenase and ammonia monooxygenase may be evolutionarily related.  
619 *FEMS Microbiol Lett* **132**: 203–208.
- 620 Horz, H.-P., Rich, V., Avrahami, S., and Bohannan, B.J.M. (2005) Methane-oxidizing bacteria in  
621 a California upland grassland soil: diversity and response to simulated global change. *Appl*  
622 *Environ Microbiol* **71**: 2642–2652.
- 623 Hu, B., Shen, L., Lian, X., Zhu, Q., Liu, S., Huang, Q., et al. (2014) Evidence for nitrite-  
624 dependent anaerobic methane oxidation as a previously overlooked microbial methane sink  
625 in wetlands. *Proc Natl Acad Sci* **111**: 4495 LP – 4500.
- 626 Hütsch, B.W. (1998) Tillage and land use effects on methane oxidation rates and their vertical  
627 profiles in soil. *Biol Fertil Soils* **27**: 284–292.
- 628 Hütsch, B.W., Webster, C.P., and Powlson, D.S. (1994) Methane oxidation in soil as affected by  
629 land use, soil pH and N fertilization. *Soil Biol Biochem* **26**: 1613–1622.
- 630 IBRA7 (2012) Interim Bioregionalisation for Australia, version 7.
- 631 Jenkins, M. and Adams, M.A. (2010) Vegetation type determines heterotrophic respiration in  
632 subalpine Australian ecosystems. *Glob Chang Biol* **16**: 209–219.
- 633 Jónsson, J.Ö.G. and Davíðsdóttir, B. (2016) Classification and valuation of soil ecosystem  
634 services. *Agric Syst* **145**: 24–38.



- 635 Kalyuzhnaya, M.G., Yang, S., Rozova, O.N., Smalley, N.E., Clubb, J., Lamb, A., et al. (2013)  
636 Highly efficient methane biocatalysis revealed in a methanotrophic bacterium. *Nat Commun*  
637 **4**: 2785.
- 638 Karbin, S., Hagedorn, F., Hiltbrunner, D., Zimmermann, S., and Niklaus, P.A. (2016) Spatial  
639 micro-distribution of methanotrophic activity along a 120-year afforestation  
640 chronosequence. *Plant Soil* **415**: 1–11.
- 641 Khadem, A.F., Wiczorek, A.S., Pol, A., Vuilleumier, S., Harhangi, H.R., Dunfield, P.F., et al.  
642 (2012) Draft Genome Sequence of the Volcano-Inhabiting Thermoacidophilic  
643 Methanotroph *Methylobacterium thermophilum* Strain SolV. *J*  
644 *Bacteriol* **194**: 3729 LP – 3730.
- 646 Kirschke, S., Bousquet, P., Ciais, P., Saunois, M., Canadell, J.G., Dlugokencky, E.J., et al.  
647 (2013) Three decades of global methane sources and sinks. *Nat Geosci* **6**: 813–823.
- 648 Kits, K.D., Campbell, D.J., Rosana, A.R., and Stein, L.Y. (2015) Diverse electron sources  
649 support denitrification under hypoxia in the obligate methanotroph *Methylomicrobium*  
650 *album* strain BG8. *Front Microbiol* **6**: 1072.
- 651 Knief, C. (2015) Diversity and habitat preferences of cultivated and uncultivated aerobic  
652 methanotrophic bacteria evaluated based on *pmoA* as molecular marker. *Front Microbiol* **6**:  
653 1346.
- 654 Knief, C., Lipski, A., and Dunfield, P.F. (2003) Diversity and activity of methanotrophic bacteria  
655 in different upland soils. *Appl Environ Microbiol* **69**: 6703–6714.

- 656 Kolb, S. (2009) The quest for atmospheric methane oxidizers in forest soils. *Environ Microbiol*  
657 *Rep 1*: 336–346.
- 658 Kolb, S., Knief, C., Dunfield, P.F., and Conrad, R. (2005) Abundance and activity of uncultured  
659 methanotrophic bacteria involved in the consumption of atmospheric methane in two forest  
660 soils. *Environ Microbiol* **7**: 1150–1161.
- 661 Kolb, S., Knief, C., Stubner, S., and Conrad, R. (2003) Quantitative detection of methanotrophs  
662 in soil by novel pmoA-targeted Real-Time PCR assays. *Appl Environ Microbiol* **69**: 2423–  
663 2429.
- 664 Koschorreck, M. and Conrad, R. (1993) Oxidation of atmospheric methane in soil:  
665 Measurements in the field, in soil cores and in soil samples. *Global Biogeochem Cycles* **7**:  
666 109–121.
- 667 Krause, S., Meima-Franke, M., Hefting, M.M., and Bodelier, P.L.E. (2013) Spatial patterns of  
668 methanotrophic communities along a hydrological gradient in a riparian wetland. *FEMS*  
669 *Microbiol Ecol* **86**: 59–70.
- 670 Luesken, F.A., Wu, M.L., Op den Camp, H.J.M., Keltjens, J.T., Stunnenberg, H., Francoijs, K.,  
671 et al. (2012) Effect of oxygen on the anaerobic methanotroph ‘Candidatus Methylomirabilis  
672 oxyfera’: kinetic and transcriptional analysis. *Environ Microbiol* **14**: 1024–1034.
- 673 Malghani, S., Reim, A., von Fischer, J., Conrad, R., Kuebler, K., and Trumbore, S.E. (2016) Soil  
674 methanotroph abundance and community composition are not influenced by substrate  
675 availability in laboratory incubations. *Soil Biol Biochem* **101**: 184–194.
- 676 Martin, M. (2011) Cutadapt removes adapter sequences from high-throughput sequencing reads.

- 677            *EMBnet J* **17**: pp-10.
- 678    McDaniel, M.D., Kaye, J.P., and Kaye, M.W. (2014) Do “hot moments” become hotter under  
679            climate change? Soil nitrogen dynamics from a climate manipulation experiment in a post-  
680            harvest forest. *Biogeochemistry* **121**: 339–354.
- 681    McDaniel, M.D., Simpson, R.R., Malone, B.P., McBratney, A.B., Minasny, B., and Adams,  
682            M.A. (2017) Quantifying and predicting spatio-temporal variability of soil CH<sub>4</sub> and N<sub>2</sub>O  
683            fluxes from a seemingly homogeneous Australian agricultural field. *Agric Ecosyst Environ*  
684            **240**: 182–193.
- 685    Le Mer, J. and Roger, P. (2001) Production, oxidation, emission and consumption of methane by  
686            soils: A review. *Eur J Soil Biol* **37**: 25–50.
- 687    Murrell, J.C. and Jetten, M.S.M. (2009) The microbial methane cycle. *Environ Microbiol Rep* **1**:  
688            279–284.
- 689    Nazaries, L., Murrell, J.C., Millard, P., Baggs, L., and Singh, B.K. (2013) Methane, microbes  
690            and models: fundamental understanding of the soil methane cycle for future predictions.  
691            *Environ Microbiol* **15**: 2395–2417.
- 692    Nazaries, L., Pan, Y., Bodrossy, L., Baggs, E.M., Millard, P., Murrell, J.C., and Singh, B.K.  
693            (2013) Evidence of microbial regulation of biogeochemical cycles from a study on methane  
694            flux and land use change. *Appl Environ Microbiol* **79**: 4031–4040.
- 695    Nazaries, L., Tate, K.R., Ross, D.J., Singh, J., Dando, J., Saggarr, S., et al. (2011) Response of  
696            methanotrophic communities to afforestation and reforestation in New Zealand. *ISME J* **5**:  
697            1832–1836.

- 698 Ni, X. and Groffman, P.M. (2018) Declines in methane uptake in forest soils. *Proc Natl Acad Sci*  
699 **115**: 8587–8590.
- 700 Oksanen, J., Blanchet, F.G., Kindt, R., Legendre, P., Minchin, P.R., O’Hara, R.B., et al. (2016)  
701 *vegan*: Community Ecology Package.
- 702 Oremland, R.S. and Culbertson, C.W. (1992) Evaluation of methyl fluoride and dimethyl ether  
703 as inhibitors of aerobic methane oxidation. *Appl Environ Microbiol* **58**: 2983–2992.
- 704 Pratscher, J., Dumont, M.G., and Conrad, R. (2011) Assimilation of acetate by the putative  
705 atmospheric methane oxidizers belonging to the USC $\alpha$  clade. *Environ Microbiol* **13**: 2692–  
706 2701.
- 707 Pratscher, J., Vollmers, J., Wiegand, S., Dumont, M.G., and Kaster, A. (2018) Unravelling the  
708 identity, metabolic potential and global biogeography of the atmospheric methane-oxidizing  
709 Upland Soil Cluster  $\alpha$ . *Environ Microbiol* **20**: 1016–1029.
- 710 Priemé, A. and Christensen, S. (1997) Seasonal and spatial variation of methane oxidation in a  
711 Danish spruce forest. *Soil Biol Biochem* **29**: 1165–1172.
- 712 Priemé, A., Christensen, S., Dobbie, K.E., and Smith, K.A. (1997) Slow increase in rate of  
713 methane oxidation in soils with time following land use change from arable agriculture to  
714 woodland. *Soil Biol Biochem* **29**: 1269–1273.
- 715 R Core Team (2018) R: A language and environment for statistical computing.
- 716 Reeburgh, W.S. (2003) Global methane biogeochemistry. *Treatise on geochemistry* **4**: 347.
- 717 Reim, A., Hernández, M., Klose, M., Chidthaisong, A., Yuttitham, M., and Conrad, R. (2017)  
718 Response of methanogenic microbial communities to desiccation stress in flooded and rain-

- 719 fed paddy soil from Thailand. *Front Microbiol* **8**: 785.
- 720 Saari, A., Martikainen, P.J., Ferm, A., Ruuskanen, J., De Boer, W., Troelstra, S.R., and  
721 Laanbroek, H.J. (1997) Methane oxidation in soil profiles of Dutch and Finnish coniferous  
722 forests with different soil texture and atmospheric nitrogen deposition. *Soil Biol Biochem*  
723 **29**: 1625–1632.
- 724 Sass, R., Denmead, O.T., Conrad, R., Freney, J., Klug, M., Minami, K., et al. (1992) Exchange  
725 of methane and other trace gases in rice cultivation. *Ecol Bull* 199–206.
- 726 Saunio, M., Bousquet, P., Poulter, B., Peregon, A., Ciais, P., Canadell, J.G., et al. (2016) The  
727 global methane budget 2000–2012. *Earth Syst Sci Data* **8**: 697–751.
- 728 Schloss, P.D., Westcott, S.L., Ryabin, T., Hall, J.R., Hartmann, M., Hollister, E.B., et al. (2009)  
729 Introducing mothur: open-source, platform-independent, community-supported software for  
730 describing and comparing microbial communities. *Appl Environ Microbiol* **75**: 7537–7541.
- 731 Schnell, S. and King, G.M. (1994) Mechanistic analysis of ammonium inhibition of atmospheric  
732 methane consumption in forest soils. *Appl Environ Microbiol* **60**: 3514–3521.
- 733 Sexstone, A.J., Revsbech, N.P., Parkin, T.B., and Tiedje, J.M. (1985) Direct measurement of  
734 oxygen profiles and denitrification rates in soil aggregates. *Soil Sci Soc Am J* **49**: 645–651.
- 735 Shrestha, P.M., Kammann, C., Lenhart, K., Dam, B., and Liesack, W. (2012) Linking activity,  
736 composition and seasonal dynamics of atmospheric methane oxidizers in a meadow soil.  
737 *ISME J* **6**: 1115–1126.
- 738 Shukla, P.N., Pandey, K.D., and Mishra, V.K. (2013) Environmental determinants of soil  
739 methane oxidation and methanotrophs. *Crit Rev Environ Sci Technol* **43**: 1945–2011.

- 740 SILO - Queensland Government.
- 741 Singh, J.S., Singh, Smita, Raghubanshi, A.S., Singh, Saranath, Kashyap, A.K., and Reddy, V.S.  
742 (1997) Effect of soil nitrogen, carbon and moisture on methane uptake by dry tropical forest  
743 soils. *Plant Soil* **196**: 115–121.
- 744 Singleton, C.M., McCalley, C.K., Woodcroft, B.J., Boyd, J.A., Evans, P.N., Hodgkins, S.B., et  
745 al. (2018) Methanotrophy across a natural permafrost thaw environment. *ISME J* **12**: 2544–  
746 2558.
- 747 Smith, K.A., Dobbie, K.E., Ball, B.C., Bakken, L.R., Sitaula, B.K., Hansen, S., et al. (2000)  
748 Oxidation of atmospheric methane in Northern European soils, comparison with other  
749 ecosystems, and uncertainties in the global terrestrial sink. *Glob Chang Biol* **6**: 791–803.
- 750 Stocker, D.Q. (2013) Climate change 2013: The physical science basis. *Work Gr I Contrib to*  
751 *Fifth Assess Rep Intergov Panel Clim Chang Summ Policymakers, IPCC*.
- 752 Sullivan, B.W., Kolb, T.E., Hart, S.C., Kaye, J.P., Hungate, B.A., Dore, S., and Montes-Helu, M.  
753 (2010) Wildfire reduces carbon dioxide efflux and increases methane uptake in ponderosa  
754 pine forest soils of the southwestern USA. *Biogeochemistry* **104**: 251–265.
- 755 Sullivan, B.W., Selmants, P.C., and Hart, S.C. (2013) Does dissolved organic carbon regulate  
756 biological methane oxidation in semiarid soils? *Glob Chang Biol* **19**: 2149–2157.
- 757 Tarboton, D.G. (2005) Terrain analysis using digital elevation models (TauDEM). *Utah State*  
758 *Univ Logan*.
- 759 Thauer, R.K., Kaster, A.-K., Seedorf, H., Buckel, W., and Hedderich, R. (2008) Methanogenic  
760 archaea: ecologically relevant differences in energy conservation. *Nat Rev Microbiol* **6**:

- 761           579–591.
- 762    Tilman, D., Reich, P.B., Knops, J., Wedin, D., Mielke, T., and Lehman, C. (2001) Diversity and  
763           productivity in a long-term grassland experiment. *Science* (80- ) **294**: 843–845.
- 764    Tveit, A.T., Hestnes, A.G., Robinson, S.L., Schintlmeister, A., Dedysh, S.N., Jehmlich, N., et al.  
765           (2019) Widespread soil bacterium that oxidizes atmospheric methane. *Proc Natl Acad Sci*  
766           **116**: 8515 LP – 8524.
- 767    Velthof, G.L., Jarvis, S.C., Stein, A., Allen, A.G., and Oenema, O. (1996) Spatial variability of  
768           nitrous oxide fluxes in mown and grazed grasslands on a poorly drained clay soil. *Soil Biol*  
769           *Biochem* **28**: 1215–1225.
- 770    Warnes, G., Bolker, B., and Lumley, T. (2015) gplots: various R programming tools for plotting  
771           data. R package version 2.6.0.
- 772    Wille, C., Kutzbach, L., Sachs, T., Wagner, D., and Pfeiffer, E.M. (2008) Methane emission  
773           from Siberian arctic polygonal tundra: Eddy covariance measurements and modeling. *Glob*  
774           *Chang Biol* **14**: 1395–1408.
- 775    Wolf, K., Flessa, H., and Veldkamp, E. (2012) Atmospheric methane uptake by tropical montane  
776           forest soils and the contribution of organic layers. *Biogeochemistry* **111**: 469–483.
- 777    Wu, X., Yao, Z., Brüggemann, N., Shen, Z.Y., Wolf, B., Dannenmann, M., et al. (2010) Effects  
778           of soil moisture and temperature on CO<sub>2</sub> and CH<sub>4</sub> soil–atmosphere exchange of various  
779           land use/cover types in a semi-arid grassland in Inner Mongolia, China. *Soil Biol Biochem*  
780           **42**: 773–787.
- 781    Yabe, S., Sakai, Y., Abe, K., and Yokota, A. (2017) Diversity of Ktedonobacteria with

- 782 Actinomycetes-Like Morphology in Terrestrial Environments. *Microbes Environ* **32**: 61–70.
- 783 Yang, W.H. and Silver, W.L. (2016) Net soil-atmosphere fluxes mask patterns in gross  
784 production and consumption of nitrous oxide and methane in a managed ecosystem.  
785 *Biogeosciences* **13**: 1705.
- 786 Yokota, A. (2012) Cultivation of uncultured bacteria of the class Ktedonobacteria in the Phylum  
787 Chloroflexi. *Makara J Sci* **1**: 1–8.
- 788 Yu, Y., Lee, C., Kim, J., and Hwang, S. (2005) Group-specific primer and probe sets to detect  
789 methanogenic communities using quantitative real-time polymerase chain reaction.  
790 *Biotechnol Bioeng* **89**: 670–679.
- 791 Zhou, J., Xia, B., Treves, D.S., Wu, L.-Y., Marsh, T.L., O’Neill, R. V, et al. (2002) Spatial and  
792 resource factors influencing high microbial diversity in soil. *Appl Environ Microbiol* **68**:  
793 326–334.
- 794 Zuur, A.F., Ieno, E.N., and Elphick, C.S. (2010) A protocol for data exploration to avoid  
795 common statistical problems. *Methods Ecol Evol* **1**: 3–14.
- 796



**Table 1.** Annual estimates (mean, standard error, and range) for net ecosystem flux of carbon dioxide and methane

| Ecosystem       | % of 548 ha Watershed* | Net Ecosystem Flux                                                  |                 |
|-----------------|------------------------|---------------------------------------------------------------------|-----------------|
|                 |                        | CO <sub>2</sub>                                                     | CH <sub>4</sub> |
|                 |                        | <i>CO<sub>2</sub>-equivalents g m<sup>-2</sup> y<sup>-1</sup></i>   |                 |
| Forest          | 8-75                   | 911 ± 165                                                           | -506 ± 22       |
| Grassland       | 25-91                  | 484 ± 50                                                            | -259 ± 38       |
| Bog             | 1                      | 646 ± 109                                                           | 256 ± 82        |
|                 |                        | <i>CO<sub>2</sub>-equivalents kg ha<sup>-1</sup> y<sup>-1</sup></i> |                 |
| Total Watershed |                        | 5207 to 8031                                                        | -2762 to -4391  |

**Table 2.** Comparison of Global and Australian Alps soil methane sink estimates

| Measurement                                                                                          | Values          |                 |                 |
|------------------------------------------------------------------------------------------------------|-----------------|-----------------|-----------------|
| <b><i>Ecosystems Areal Coverage</i></b>                                                              |                 |                 |                 |
| Global forest+grassland ecosystems (millions of ha)                                                  | 5,100           |                 |                 |
| Areal coverage of Australian Alps – Figure 8 (millions of ha)                                        | 1.23            |                 |                 |
| Fraction of Australian Alps to global forest+grassland (%)                                           | 0.024           |                 |                 |
| <b><i>Soil CH<sub>4</sub> Sink Estimates</i></b>                                                     |                 |                 |                 |
|                                                                                                      | <b>Low</b>      | <b>Best</b>     | <b>High</b>     |
|                                                                                                      | <b>Estimate</b> | <b>Estimate</b> | <b>Estimate</b> |
| Global CH <sub>4</sub> Soil Sink <sup>†</sup> (Tg y <sup>-1</sup> )                                  | -9              | -30             | -100            |
| Mean annual Australian Alps CH <sub>4</sub> sink <sup>‡</sup> (kg ha <sup>-1</sup> y <sup>-1</sup> ) | -4.2            | -19.2           | -33.2           |
| <b><i>Australian Alps Contribution to Global CH<sub>4</sub> Sink (%)</i></b>                         |                 |                 |                 |
|                                                                                                      | <b>Low</b>      | <b>Best</b>     | <b>High</b>     |
|                                                                                                      | <b>Estimate</b> | <b>Estimate</b> | <b>Estimate</b> |
| Low estimate (-6.2 kg ha <sup>-1</sup> y <sup>-1</sup> )                                             | 69              | 21              | 6               |
| Best Estimate, or our projection (-19.2 kg ha <sup>-1</sup> y <sup>-1</sup> )                        | 213             | 64              | 19              |
| High estimate (-32.3 kg ha <sup>-1</sup> y <sup>-1</sup> )                                           | 359             | 108             | 32              |

†: Low and Best Estimates from Kirschke et al. (2013) and Saunio et al. (2016). Other estimates have a high estimates of -100 Tg y<sup>-1</sup> (Smith et al. 2000)

‡: Based on forest foliage imagery, soil temperatures and moisture estimates, and CH<sub>4</sub> modeling described in Experimental Procedures. High and Low estimate from +/- relative standard deviation from ecosystem means.

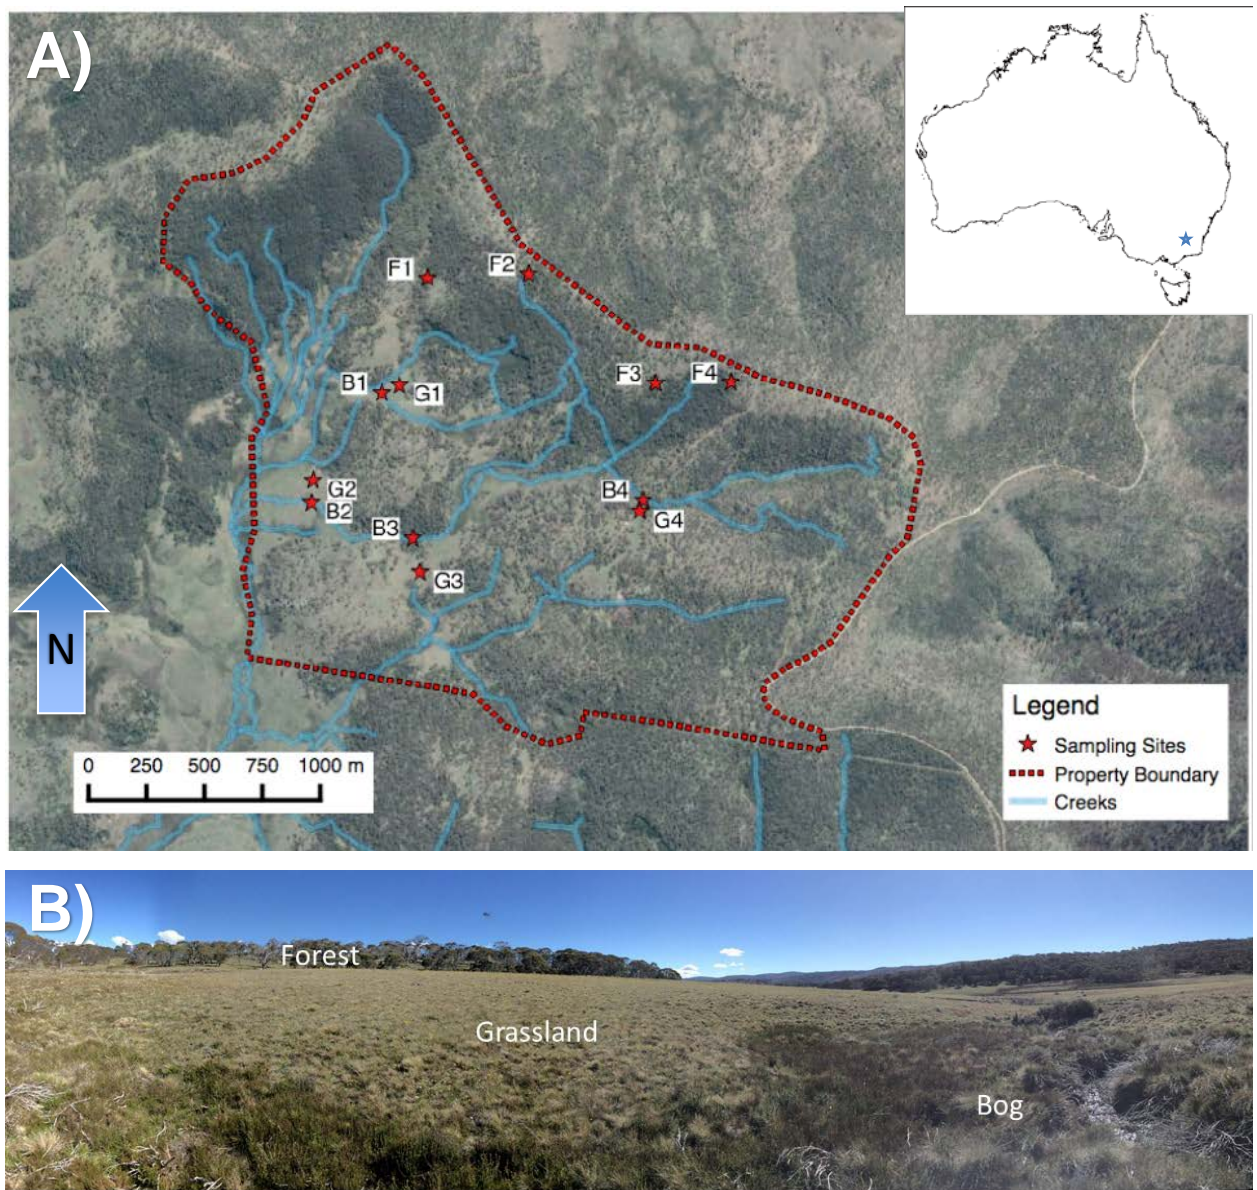

**Fig. 1.** **A)** Location of 548 ha experiment area (inset of Australia), sampling sites within area and nearby streams. **B)** Landscape-level photograph of the vegetation gradient from sphagnum-dominated bog in foreground to eucalyptus-dominated forest in background. Abbreviations are F = Forest, G = Grassland, and B = Bog. The numbers after the letter represent which transect the sampling location belongs to.

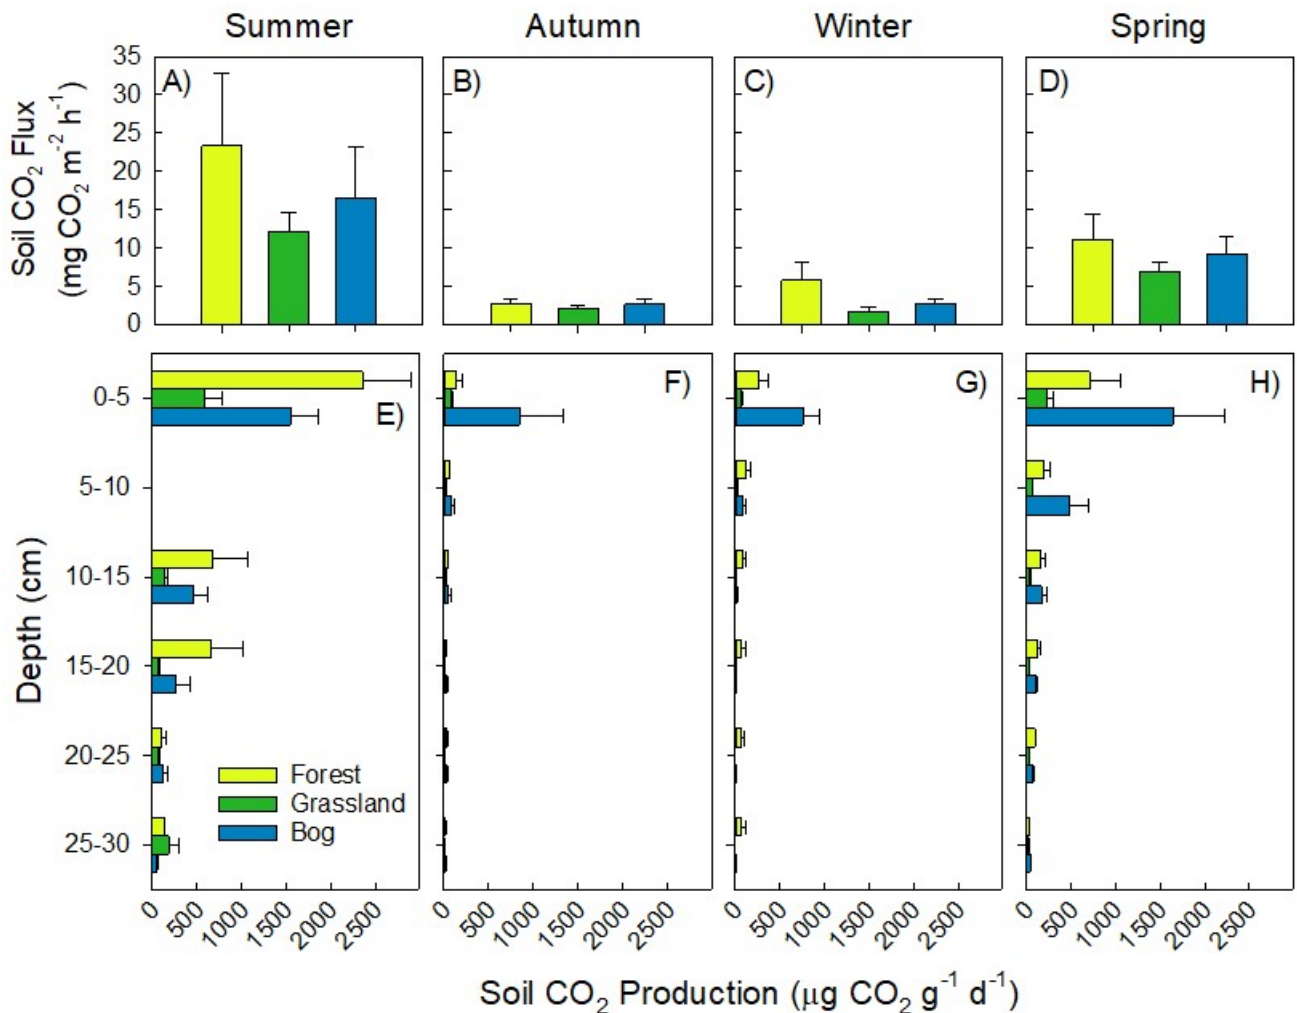

**Fig. 2.** Soil CO<sub>2</sub> fluxes (top panels, **A-D**) and production (bottom panels, **E-H**). Surface flux measurements and soils collected for production on 17 February (Summer, **A** & **E**), 25 May (Autumn, **B** & **F**), 22 September (Winter, **C** & **G**), and 23 November (Spring, **D** & **H**) in 2015. Mean and standard error shown (n = 4).

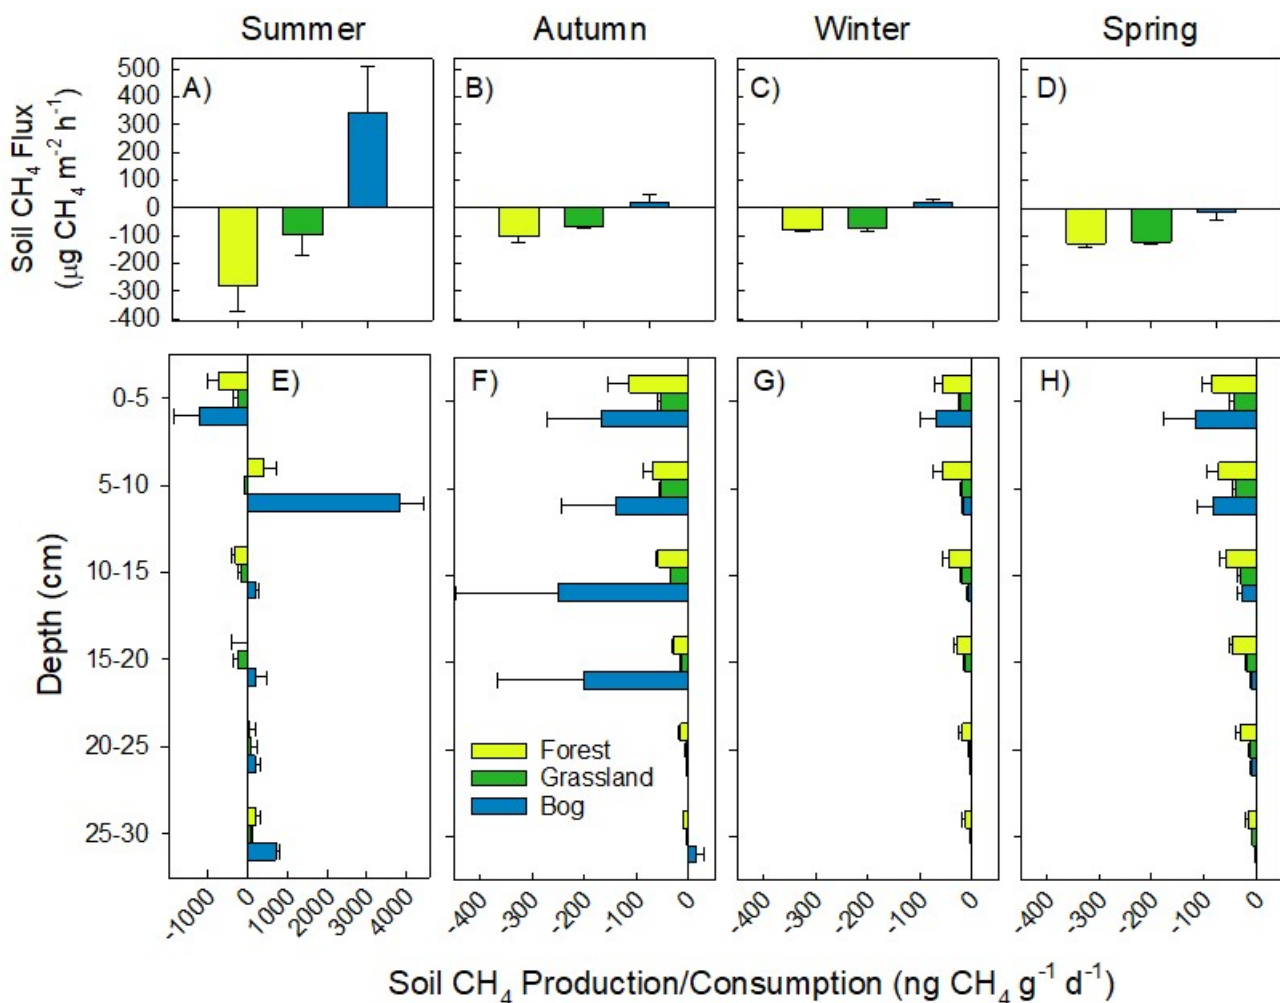

**Fig. 3.** Soil CH<sub>4</sub> fluxes (top panels, **A-D**) and production/consumption (bottom panels, **E-H**). Surface flux measurements and soils collected for production on 17 February (Summer, **A & E**), 25 May (Autumn, **B & F**), 22 September (Winter, **C & G**), and 23 November (Spring, **D & H**) in 2015. Mean and standard error shown (n = 4).

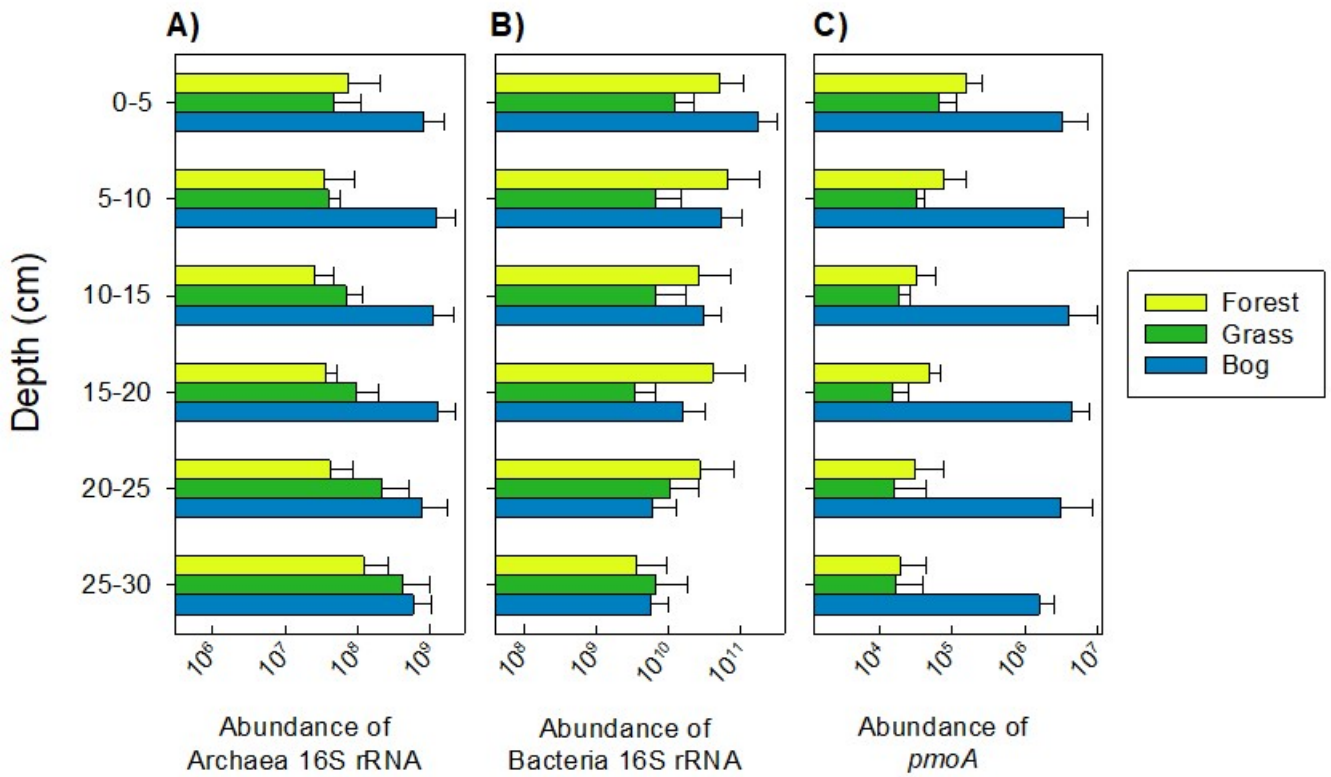

**Fig. 4.** Abundance of archaeal (A) and bacterial (B) 16S rRNA genes, and *pmoA* (C). Means and standard error are shown (n=4) for all samples.

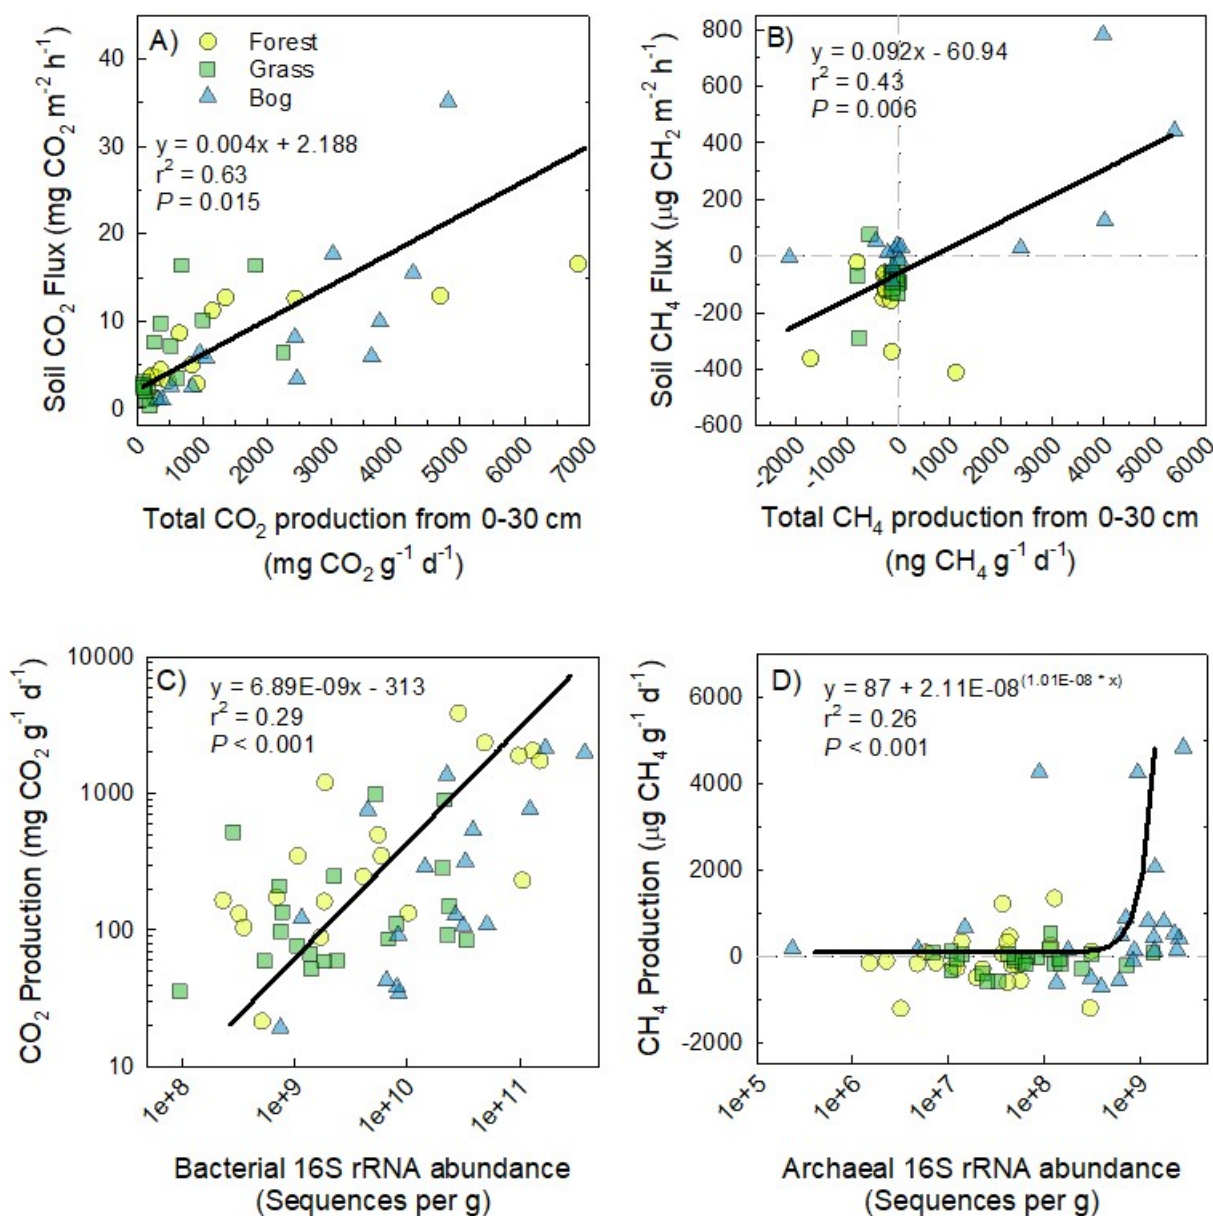

**Fig. 5.** Regressions between total CO<sub>2</sub> production and CO<sub>2</sub> soil-atmosphere flux (A), CH<sub>4</sub> production and CH<sub>4</sub> soil-atmosphere flux (B). Total GHG production was calculated for each soil profile as sum of production from 0 to 30 cm depth. Regressions between bacterial 16S rRNA abundance with CO<sub>2</sub> production (C, linear equation with log, log scale). Regression between and archaeal 16S rRNA and CH<sub>4</sub> production (D, 3-parameter exponential, log x-axis). Equations, chosen by best fit, are shown in each panel.

**A)**

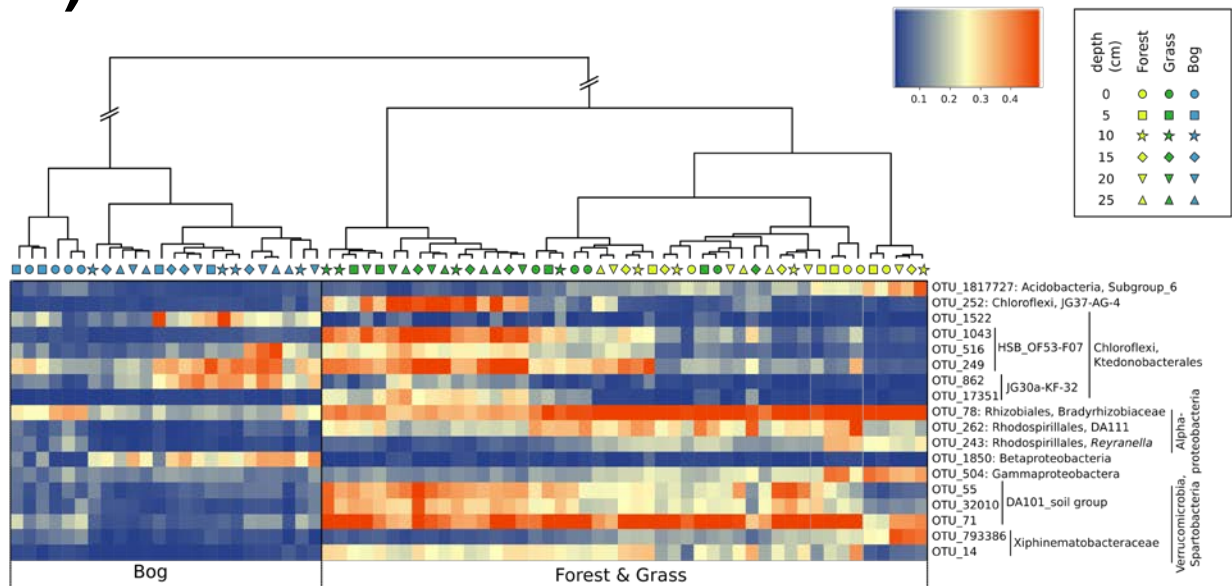

**B)**

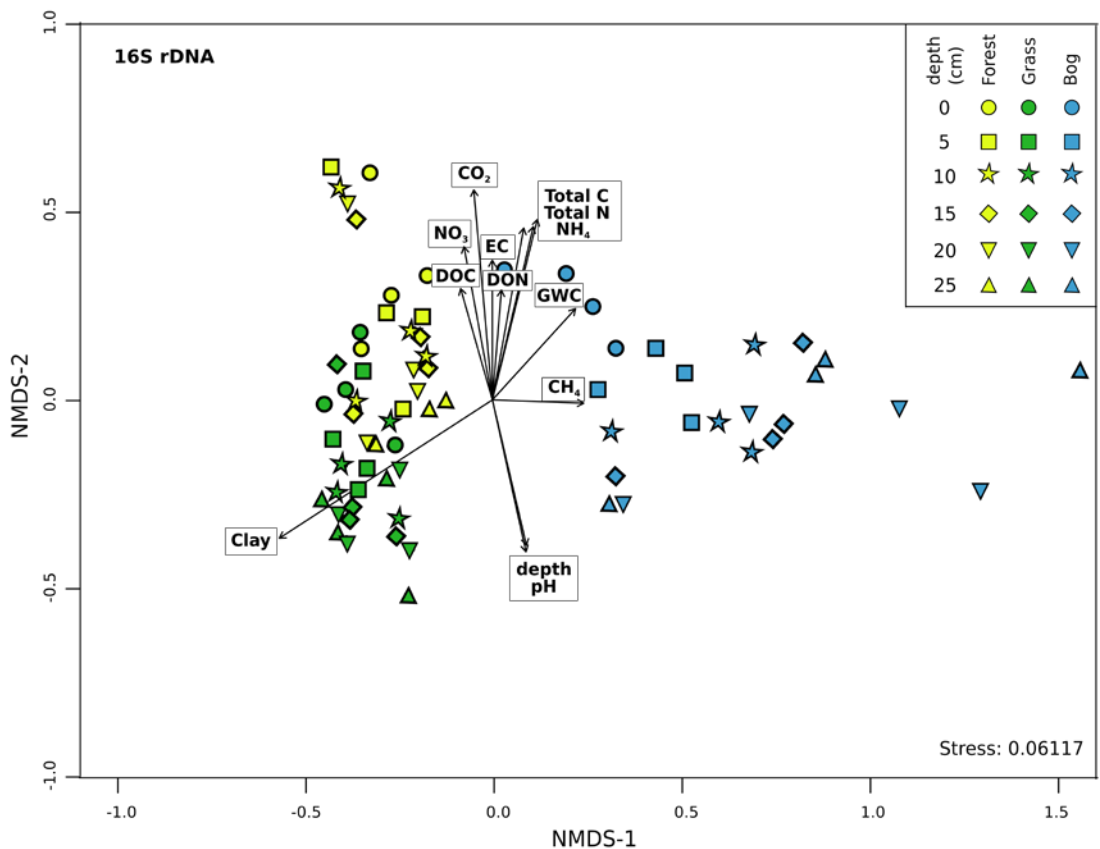

**Fig. 6. A)** Heatmap of the most relevant OTUs derived from bacterial 16S rRNA genes. The samples and OTUs were clustered according to Euclidean distances between all Hellinger transformed data. The taxonomy of OTUs was determined using the Sina classifier. The colored scale gives the percentage abundance of OTUs. **B)** NMDS ordination of bacterial 16S rRNA communities based on the Bray–Curtis dissimilarity of community composition (stress = 0.061). Arrows indicate the direction at which the environmental vectors fit the best (using the *envfit* function) onto the NMDS ordination space. EC, electrical conductivity; DOC, dissolved organic carbon; DON, dissolved organic nitrogen; GWC, gravimetric water content.



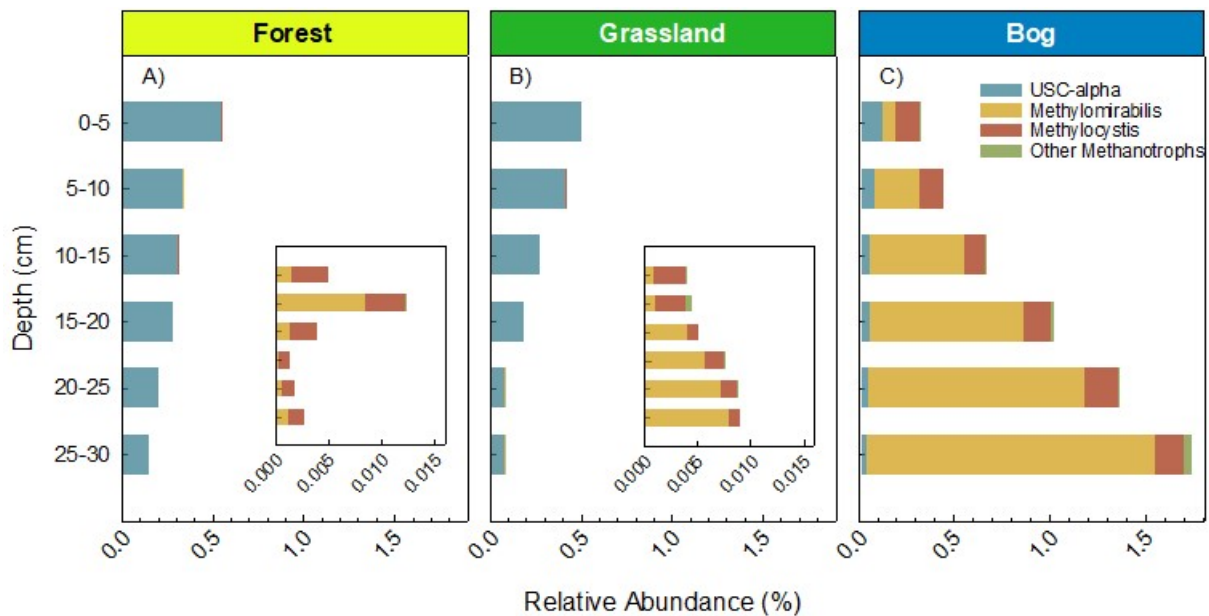

**Fig. 7.** Relative abundance of 16S rRNA genes of the dominant methanotroph groups detected in the forest (A), grass (B), and bog (C) sites. USC $\alpha$  was identified by blast as described in the methods. *Methylocystis* and *Methyloirabilis* were identified based on the Silva classifications. Other methanotrophs include *Methylomonas* and *Methylospira*.

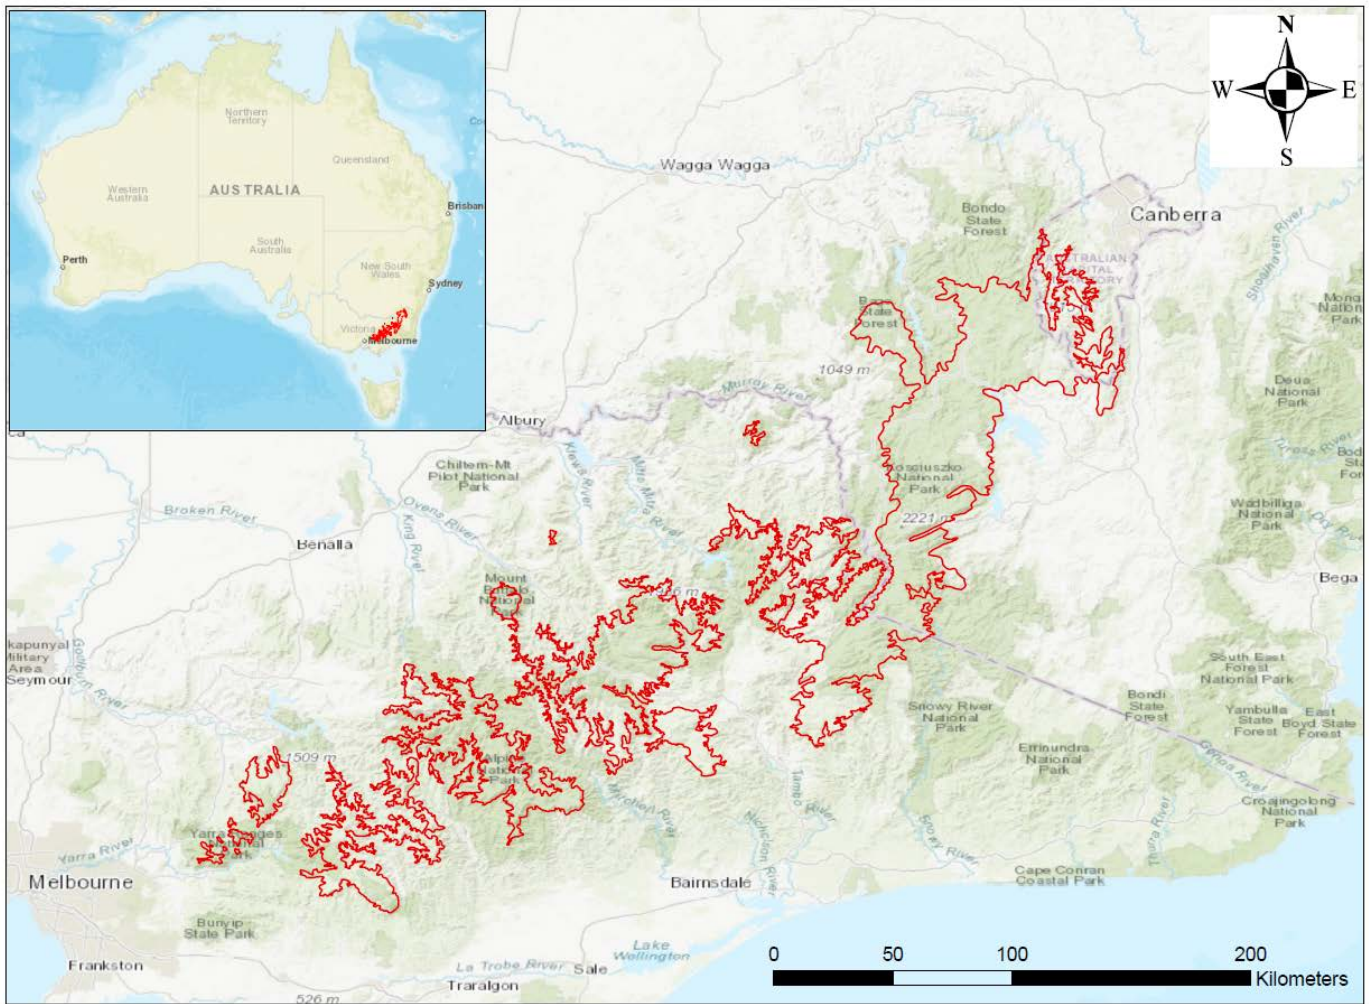

**Fig. 8.** Areal coverage of Australian Alps in southeastern Australia (1.2M ha).

**A)**

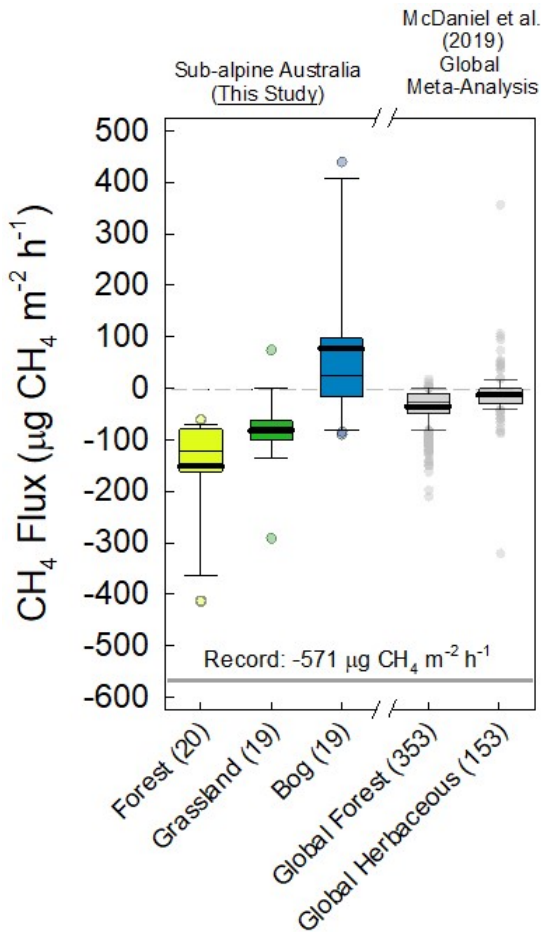

**B)**

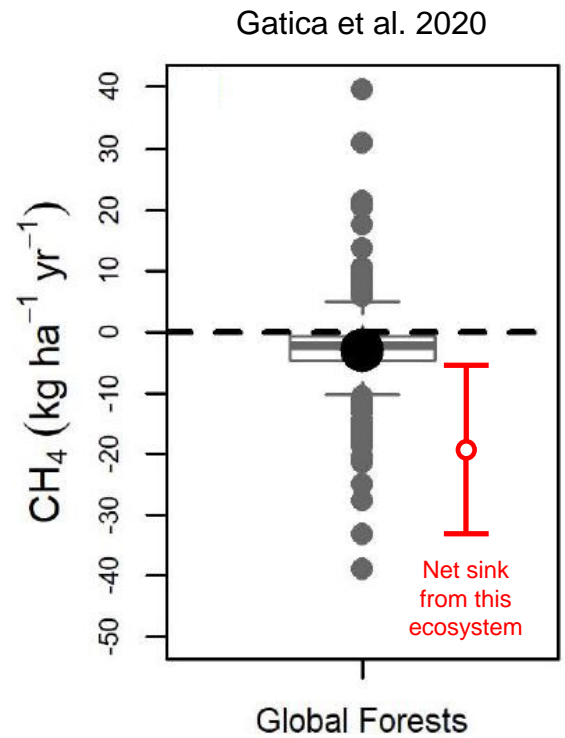

**Fig. 9. A)** Hourly methane ( $\text{CH}_4$ ) fluxes from this study's Forest, Grassland and Bog soils compared to Forest and Herbaceous studies from a global meta-analysis (McDaniel et al. 2019). 10<sup>th</sup> and 90<sup>th</sup> percentile shown by bottom and top whisker. 25<sup>th</sup> and 75<sup>th</sup> percentile shown by bottom and top of the box. Median is shown by the thin line, mean by the thick line, and outliers are circles. The number of measurements within each boxplot are shown in parentheses. Gray bar at  $-571 \mu\text{g CH}_4 \text{ m}^{-2} \text{ h}^{-1}$  is the greatest  $\text{CH}_4$  oxidation rate (most negative flux) ever observed and published (Singh et al., 1997). **B)** Figure from survey of global forest  $\text{CH}_4$  fluxes (Gatica et al. 2020) with our modeled annual mean net  $\text{CH}_4$  sink from Australian Alps and range created  $\pm$  relative standard deviation from ecosystem means (Table 2).

## **Supplementary Information**

### **Disproportionate CH<sub>4</sub> sink strength from an endemic, sub-alpine Australian soil microbial community**

M.D. McDaniel<sup>1,2\*‡</sup>, M. Hernández<sup>3,4\*</sup>, M.G. Dumont<sup>3,5</sup>, L.J. Ingram<sup>1</sup>, and M.A. Adams<sup>1,6</sup>

1. Centre for Carbon Water and Food | Sydney Institute of Agriculture | University of Sydney | Sydney, Australia 2000
2. Department of Agronomy | Iowa State University | Ames, Iowa USA 50011
3. Max Planck Institute for Terrestrial Microbiology | Marburg, Germany D-35037
4. School of Environmental Sciences | Norwich Research Park | University of East Anglia, Norwich, UK NR4 7TJ
5. Centre for Biological Sciences | University of Southampton | Southampton, UK SO17 1BJ
6. School of Science | Engineering and Technology | The University of Swinburne | Melbourne, Australia 3122

## **Supplementary Information Table of Contents**

### **TABLES**

|                                                                                                                                                                                               |          |
|-----------------------------------------------------------------------------------------------------------------------------------------------------------------------------------------------|----------|
| <b>Table S1.</b> Chamber and soil microclimate at time of sampling, and incubation temperature by date in 2015 (means $\pm$ standard errors)†.....                                            | <b>3</b> |
| <b>Table S2.</b> Dynamic soil physical and chemical characteristics by date in 2015 (means $\pm$ standard errors)† ...                                                                        | <b>4</b> |
| <b>Table S3.</b> Static soil physical and chemical characteristics – from 17 February 2015 (means $\pm$ standard errors) .....                                                                | <b>6</b> |
| <b>Table S4.</b> Barcode identification for each of the samples analyzed. Raw data were deposited under the study accession number PRJNA384296 in the NCBI Sequence Read Archive (SRA). ..... | <b>7</b> |

### **FIGURES**

|                                                                                                                                                                                                                                                                                                                                                                                                                                                                                                                                                                   |           |
|-------------------------------------------------------------------------------------------------------------------------------------------------------------------------------------------------------------------------------------------------------------------------------------------------------------------------------------------------------------------------------------------------------------------------------------------------------------------------------------------------------------------------------------------------------------------|-----------|
| <b>Figure S1.</b> Bacterial 16S rRNA gene diversity measured as Shannon Diversity ( $H'$ ) and Richness ( $S$ ) (n=4, means $\pm$ standard errors). .....                                                                                                                                                                                                                                                                                                                                                                                                         | <b>10</b> |
| <b>Figure S2.</b> Relative abundance of <i>pmoA</i> genes of the dominant methanotroph groups. ....                                                                                                                                                                                                                                                                                                                                                                                                                                                               | <b>11</b> |
| <b>Figure S3.</b> NMDS ordination of <i>pmoA</i> (A) and euryarchaeota (B) communities based on the Bray–Curtis dissimilarity of community composition. Shape indicates depth and sites are colored according to the soil type. The arrows indicate the direction at which the environmental vectors fit the best (using the <i>envfit</i> function) onto the NMDS ordination space. Abbreviations: DOC, dissolved organic carbon; DON, dissolved organic nitrogen; EC, electrical conductivity; GWC, gravimetric water content; NH <sub>4</sub> , ammonium. .... | <b>12</b> |
| <b>Figure S4.</b> Example of sampling locations and streams located in a High Country region near Mt. Kosciuszko National Park, NSW, Australia. Soil/vegetation types shown along one transect in the picture above. Below are three soil cores from each of the soil/vegetation types. ....                                                                                                                                                                                                                                                                      | <b>13</b> |

**Table S1.** Chamber and soil microclimate at time of sampling, and incubation temperature by date in 2015 (means  $\pm$  standard errors)<sup>†</sup>

| Date                                   | Soil-Vegetation Type | GHG Chamber Temperature | Soil Temperature | Incubation Room Temperature Range <sup>‡</sup> | Volumetric Moisture Content            |
|----------------------------------------|----------------------|-------------------------|------------------|------------------------------------------------|----------------------------------------|
|                                        |                      | ----- ° C -----         |                  |                                                | --- m <sup>3</sup> m <sup>-3</sup> --- |
| February 17 <sup>th</sup> <sup>†</sup> | Forest               | 20.5 $\pm$ 1.9          | 13.4 $\pm$ 0.2   | 20.9 to 22.5                                   | 26.7 $\pm$ 4.9                         |
|                                        | Grassland            | 28.3 $\pm$ 2.1          | 16.4 $\pm$ 0.8   |                                                | 22.2 $\pm$ 1.8                         |
|                                        | Bog                  | 27.2 $\pm$ 3.2          | 14.1 $\pm$ 0.6   |                                                | 68.3 $\pm$ 5.7                         |
| May 25 <sup>th</sup>                   | Forest               | 10.1 $\pm$ 0.9          | 3.9 $\pm$ 0.4    | 4.9 to 5.6                                     | 18.4 $\pm$ 2.3                         |
|                                        | Grassland            | 7.5 $\pm$ 2.3           | 3.6 $\pm$ 0.2    |                                                | 27.2 $\pm$ 0.6                         |
|                                        | Bog                  | 7.5 $\pm$ 1.4           | 3.6 $\pm$ 0.8    |                                                | 77.2 $\pm$ 9.1                         |
| September 22 <sup>nd</sup>             | Forest               | 4.1 $\pm$ 0.7           | 4.3 $\pm$ 0.4    | 5.0 to 5.7                                     | 28.3 $\pm$ 3                           |
|                                        | Grassland            | 5.1 $\pm$ 1             | 4 $\pm$ 0.3      |                                                | 27.1 $\pm$ 1.7                         |
|                                        | Bog                  | 3.1 $\pm$ 2.4           | 4.6 $\pm$ 0.3    |                                                | 85.7 $\pm$ 9.3                         |
| November 23 <sup>rd</sup>              | Forest               | 21 $\pm$ 1.7            | 12.7 $\pm$ 1.1   | 13.8 to 15.6                                   | 10.5 $\pm$ 2.2                         |
|                                        | Grassland            | 17.8 $\pm$ 1.8          | 13 $\pm$ 1.1     |                                                | 14.1 $\pm$ 1.6                         |
|                                        | Bog                  | 16.3 $\pm$ 1.9          | 11.5 $\pm$ 0.8   |                                                | 57.5 $\pm$ 9.6                         |

<sup>†</sup>: Date of soil microbial community analyses.

<sup>‡</sup>: Intended to correspond to field conditions as close as possible

**Table S2.** Dynamic soil physical and chemical characteristics by date in 2015 (means  $\pm$  standard errors)<sup>†</sup>

| Date                       | Soil Type | Depth (cm)      | Gravimetric<br>Water Content | Ammonium                        | Nitrate         |
|----------------------------|-----------|-----------------|------------------------------|---------------------------------|-----------------|
|                            |           |                 | ---- g g <sup>-1</sup> ----  | ----- mg kg <sup>-1</sup> ----- |                 |
| February 17 <sup>th</sup>  | Forest    | 0 – 5           | 0.79 $\pm$ 0.1               | 73.08 $\pm$ 17.87               | 7.57 $\pm$ 7.27 |
|                            |           | 5 – 10          | 0.57 $\pm$ 0.2               | 63.92 $\pm$ 31.45               | 3.66 $\pm$ 3.41 |
|                            |           | 10 – 15         | 0.52 $\pm$ 0.18              | 49.26 $\pm$ 22.93               | 1.55 $\pm$ 1.37 |
|                            |           | 15 – 20         | 0.43 $\pm$ 0.13              | 39.62 $\pm$ 15.13               | 1.15 $\pm$ 0.8  |
|                            |           | 20 – 25         | 0.43 $\pm$ 0.14              | 35.12 $\pm$ 17.22               | 0.71 $\pm$ 0.47 |
|                            |           | 25 – 30         | 0.25 $\pm$ 0.02              | 16.94 $\pm$ 1.81                | 0.41 $\pm$ 0.16 |
|                            | Grassland | 0 – 5           | 0.38 $\pm$ 0.06              | 37.69 $\pm$ 4.54                | 0.75 $\pm$ 0.29 |
|                            |           | 5 – 10          | 0.34 $\pm$ 0.03              | 26.08 $\pm$ 1.81                | 0.47 $\pm$ 0.1  |
|                            |           | 10 – 15         | 0.31 $\pm$ 0.03              | 19.49 $\pm$ 1.73                | 0.54 $\pm$ 0.13 |
|                            |           | 15 – 20         | 0.28 $\pm$ 0.03              | 15.09 $\pm$ 1                   | 0.43 $\pm$ 0.06 |
|                            |           | 20 – 25         | 0.29 $\pm$ 0.05              | 13.41 $\pm$ 0.85                | 0.45 $\pm$ 0.07 |
|                            |           | 25 – 30         | 0.25 $\pm$ 0.03              | 11.21 $\pm$ 0.48                | 0.58 $\pm$ 0.04 |
|                            | Bog       | 0 – 5           | 4.66 $\pm$ 0.92              | 205.81 $\pm$ 21.75              | 0.61 $\pm$ 0.1  |
|                            |           | 5 – 10          | 5.83 $\pm$ 3.45              | 160.3 $\pm$ 34.53               | 0.29 $\pm$ 0.06 |
|                            |           | 10 – 15         | 2.29 $\pm$ 0.9               | 82.27 $\pm$ 23.49               | 0.21 $\pm$ 0.01 |
| 15 – 20                    |           | 1.16 $\pm$ 0.23 | 38.18 $\pm$ 11.53            | 0.27 $\pm$ 0.05                 |                 |
| 20 – 25                    |           | 1.36 $\pm$ 0.43 | 32.06 $\pm$ 11.11            | 0.2 $\pm$ 0.03                  |                 |
| 25 – 30                    |           | 0.93 $\pm$ 0.15 | 19.35 $\pm$ 5.92             | 0.16 $\pm$ 0.03                 |                 |
| May 25 <sup>th</sup>       | Forest    | 0 – 5           | 0.8 $\pm$ 0.19               | 3.17 $\pm$ 0.8                  | 0.21 $\pm$ 0.08 |
|                            |           | 5 – 10          | 0.46 $\pm$ 0.07              | 3.47 $\pm$ 0.43                 | 0.18 $\pm$ 0.11 |
|                            |           | 10 – 15         | 0.46 $\pm$ 0.1               | 4.31 $\pm$ 1.18                 | 0.25 $\pm$ 0.1  |
|                            |           | 15 – 20         | 0.42 $\pm$ 0.09              | 3.53 $\pm$ 0.26                 | 0.16 $\pm$ 0.07 |
|                            |           | 20 – 25         | 0.42 $\pm$ 0.1               | 2.83 $\pm$ 0.38                 | 0.17 $\pm$ 0.06 |
|                            |           | 25 – 30         | 0.32 $\pm$ 0.05              | 2.86 $\pm$ 0.31                 | 0.22 $\pm$ 0.12 |
|                            | Grassland | 0 – 5           | 0.43 $\pm$ 0.04              | 60.31 $\pm$ 3.72                | BDL             |
|                            |           | 5 – 10          | 0.37 $\pm$ 0.02              | 40.78 $\pm$ 0.45                | 1.28 $\pm$ 0.83 |
|                            |           | 10 – 15         | 0.35 $\pm$ 0.02              | 30.68 $\pm$ 1.63                | 0.71 $\pm$ 0.15 |
|                            |           | 15 – 20         | 0.34 $\pm$ 0.02              | 23.75 $\pm$ 0.83                | 0.15 $\pm$ 0.04 |
|                            |           | 20 – 25         | 0.32 $\pm$ 0.02              | 19.47 $\pm$ 1.18                | BDL             |
|                            |           | 25 – 30         | 0.31 $\pm$ 0.02              | 17.7 $\pm$ 2.06                 | 0.29 $\pm$ 0.12 |
|                            | Bog       | 0 – 5           | 8.7 $\pm$ 5.21               | 109.63 $\pm$ 46.63              | 0.49 $\pm$ 0.03 |
|                            |           | 5 – 10          | 3.58 $\pm$ 1.78              | 70.63 $\pm$ 35.02               | 0.87 $\pm$ 0.28 |
|                            |           | 10 – 15         | 4.75 $\pm$ 2.77              | 98.8 $\pm$ 16.42                | 0.42 $\pm$ 0.14 |
| 15 – 20                    |           | 12.5 $\pm$ 9.84 | 36.69 $\pm$ 0                | 0.94 $\pm$ 0.01                 |                 |
| 20 – 25                    |           | 1.55 $\pm$ 0.33 | 36.65 $\pm$ 2.59             | BDL                             |                 |
| 25 – 30                    |           | 1.06 $\pm$ 0.27 | 7.29 $\pm$ 4.57              | 0.24 $\pm$ 0.1                  |                 |
| September 22 <sup>nd</sup> | Forest    | 0 – 5           | 0.91 $\pm$ 0.25              | 126.08 $\pm$ 10.56              | 2.14 $\pm$ 1.55 |
|                            |           | 5 – 10          | 0.56 $\pm$ 0.14              | 67.03 $\pm$ 10.03               | 1.46 $\pm$ 1    |
|                            |           | 10 – 15         | 0.52 $\pm$ 0.13              | 54.36 $\pm$ 9.17                | 0.9 $\pm$ 0.56  |
|                            |           | 15 – 20         | 0.47 $\pm$ 0.09              | 58.92 $\pm$ 14.93               | 0.8 $\pm$ 0.5   |
|                            |           | 20 – 25         | 0.44 $\pm$ 0.08              | 51.63 $\pm$ 14.74               | 0.48 $\pm$ 0.22 |
|                            |           | 25 – 30         | 0.42 $\pm$ 0.11              | 35.61 $\pm$ 10.14               | 0.4 $\pm$ 0.09  |
|                            | Grassland | 0 – 5           | 0.45 $\pm$ 0.03              | 94.52 $\pm$ 7.72                | 0.71 $\pm$ 0.24 |
|                            |           | 5 – 10          | 0.36 $\pm$ 0.02              | 87.32 $\pm$ 24.64               | 0.83 $\pm$ 0.14 |
|                            |           | 10 – 15         | 0.34 $\pm$ 0.02              | 37.95 $\pm$ 5.23                | 0.85 $\pm$ 0.24 |
|                            |           | 15 – 20         | 0.32 $\pm$ 0.02              | 26.73 $\pm$ 3.46                | 1.01 $\pm$ 0.12 |
|                            |           | 20 – 25         | 0.3 $\pm$ 0.02               | 19.89 $\pm$ 2.6                 | 0.86 $\pm$ 0.14 |
|                            |           | 25 – 30         | 0.29 $\pm$ 0.02              | 17.9 $\pm$ 1.23                 | 1.03 $\pm$ 0.11 |
|                            | Bog       | 0 – 5           | 4.93 $\pm$ 1.34              | 152.3 $\pm$ 6.16                | 0.26 $\pm$ 0.03 |
|                            |           | 5 – 10          | 1.91 $\pm$ 0.25              | 128.86 $\pm$ 30.83              | 0.28 $\pm$ 0.03 |
|                            |           | 10 – 15         | 1.12 $\pm$ 0.22              | 73.28 $\pm$ 28.6                | 0.19 $\pm$ 0.01 |
| 15 – 20                    |           | 1.24 $\pm$ 0.23 | 85.1 $\pm$ 29.85             | 0.23 $\pm$ 0                    |                 |
| 20 – 25                    |           | 1.3 $\pm$ 0.06  | 78 $\pm$ 12.68               | 0.18 $\pm$ 0.03                 |                 |

|                           |           |             |             |                |             |
|---------------------------|-----------|-------------|-------------|----------------|-------------|
| November 23 <sup>rd</sup> | Forest    | 25 – 30     | 0.94 ± 0.03 | 42.34 ± 4.62   | BDL         |
|                           |           | 0 – 5       | 0.55 ± 0.06 | 140.41 ± 16.54 | BDL         |
|                           |           | 5 – 10      | 0.4 ± 0.06  | 76.66 ± 13.65  | BDL         |
|                           |           | 10 – 15     | 0.34 ± 0.06 | 61.67 ± 9.83   | BDL         |
|                           |           | 15 – 20     | 0.3 ± 0.04  | 47.32 ± 7.09   | BDL         |
|                           |           | 20 – 25     | 0.26 ± 0.03 | 36.05 ± 1.91   | BDL         |
|                           | Grassland | 25 – 30     | 0.25 ± 0.01 | 21.73 ± 0.37   | BDL         |
|                           |           | 0 – 5       | 0.26 ± 0.04 | 76.44 ± 7.66   | BDL         |
|                           |           | 5 – 10      | 0.29 ± 0.02 | 64.11 ± 6.2    | BDL         |
|                           |           | 10 – 15     | 0.29 ± 0.02 | 47.18 ± 4.03   | BDL         |
|                           |           | 15 – 20     | 0.29 ± 0.02 | 35.76 ± 3.38   | BDL         |
|                           |           | 20 – 25     | 0.28 ± 0.03 | 32.34 ± 2.45   | BDL         |
|                           | Bog       | 25 – 30     | 0.27 ± 0.03 | 26.16 ± 1.6    | BDL         |
|                           |           | 0 – 5       | 3.87 ± 1.53 | 224.65 ± 6.23  | 0.41 ± 0.13 |
|                           |           | 5 – 10      | 3.19 ± 1.28 | 223 ± 42.37    | BDL         |
|                           |           | 10 – 15     | 2.35 ± 0.81 | 191.28 ± 52.98 | BDL         |
|                           |           | 15 – 20     | 1.6 ± 0.61  | 90.36 ± 27.71  | BDL         |
|                           |           | 20 – 25     | 0.95 ± 0.25 | 30.89 ± 8.46   | BDL         |
|                           | 25 – 30   | 0.68 ± 0.15 | ND          | ND             |             |

†: BDL, soil extract below detection limit (0.03 mg L<sup>-1</sup>); ND, no data

‡: Date of soil microbial community analyses.



**Table S3.** Static soil physical and chemical characteristics – from 17 February 2015 (means  $\pm$  standard errors)

| Soil Type | Depth (cm) | Sand          | Silt       | Clay       | Gravel & Rocks                 | Roots or Rhizoids | pH              | Total Organic Carbon | Total Nitrogen  |
|-----------|------------|---------------|------------|------------|--------------------------------|-------------------|-----------------|----------------------|-----------------|
|           |            | ----- % ----- |            |            | ----- g cm <sup>-3</sup> ----- |                   |                 | ----- % -----        |                 |
| Forest    | 0 – 5      | 74 $\pm$ 0    | 9 $\pm$ 1  | 17 $\pm$ 1 | 64 $\pm$ 20                    | 9.68 $\pm$ 1.24   | 5.46 $\pm$ 0.14 | 10.11 $\pm$ 1.30     | 0.58 $\pm$ 0.08 |
|           | 5 – 10     | 73 $\pm$ 1    | 12 $\pm$ 1 | 15 $\pm$ 1 | 88 $\pm$ 33                    | 2.05 $\pm$ 0.69   | 5.45 $\pm$ 0.22 | 7.90 $\pm$ 1.93      | 0.44 $\pm$ 0.12 |
|           | 10 – 15    | 72 $\pm$ 3    | 13 $\pm$ 2 | 14 $\pm$ 1 | 114 $\pm$ 34                   | 3.06 $\pm$ 1.18   | 5.50 $\pm$ 0.14 | 5.46 $\pm$ 0.97      | 0.31 $\pm$ 0.07 |
|           | 15 – 20    | 76 $\pm$ 2    | 9 $\pm$ 1  | 15 $\pm$ 1 | 90 $\pm$ 16                    | 1.42 $\pm$ 0.73   | 5.51 $\pm$ 0.15 | 4.88 $\pm$ 1.12      | 0.27 $\pm$ 0.08 |
|           | 20 – 25    | 72 $\pm$ 2    | 13 $\pm$ 3 | 14 $\pm$ 2 | 100 $\pm$ 19                   | 3.67 $\pm$ 1.01   | 5.53 $\pm$ 0.10 | 4.63 $\pm$ 1.11      | 0.25 $\pm$ 0.07 |
|           | 25 – 30    | 68 $\pm$ 2    | 16 $\pm$ 2 | 16 $\pm$ 2 | 134 $\pm$ 26                   | 1.30 $\pm$ 0.86   | 5.55 $\pm$ 0.09 | 4.11 $\pm$ 1.06      | 0.22 $\pm$ 0.06 |
| Grassland | 0 – 5      | 64 $\pm$ 3    | 15 $\pm$ 2 | 22 $\pm$ 2 | 17 $\pm$ 4                     | 5.35 $\pm$ 1.27   | 5.54 $\pm$ 0.08 | 5.97 $\pm$ 0.42      | 0.41 $\pm$ 0.03 |
|           | 5 – 10     | 55 $\pm$ 3    | 20 $\pm$ 1 | 24 $\pm$ 3 | 20 $\pm$ 5                     | 0.28 $\pm$ 0.13   | 5.54 $\pm$ 0.06 | 4.67 $\pm$ 0.19      | 0.32 $\pm$ 0.01 |
|           | 10 – 15    | 56 $\pm$ 2    | 20 $\pm$ 2 | 24 $\pm$ 2 | 11 $\pm$ 3                     | 0.22 $\pm$ 0.12   | 5.49 $\pm$ 0.05 | 3.86 $\pm$ 0.11      | 0.26 $\pm$ 0.01 |
|           | 15 – 20    | 53 $\pm$ 2    | 21 $\pm$ 3 | 26 $\pm$ 2 | 13 $\pm$ 3                     | 0.09 $\pm$ 0.03   | 5.52 $\pm$ 0.04 | 3.1 $\pm$ 0.19       | 0.21 $\pm$ 0.01 |
|           | 20 – 25    | 54 $\pm$ 3    | 20 $\pm$ 3 | 25 $\pm$ 2 | 17 $\pm$ 4                     | 1.21 $\pm$ 1.12   | 5.52 $\pm$ 0.06 | 2.61 $\pm$ 0.17      | 0.18 $\pm$ 0.01 |
|           | 25 – 30    | 55 $\pm$ 3    | 20 $\pm$ 3 | 24 $\pm$ 1 | 22 $\pm$ 3                     | 0.05 $\pm$ 0.04   | 5.58 $\pm$ 0.08 | 2.34 $\pm$ 0.22      | 0.16 $\pm$ 0.01 |
| Bog       | 0 – 5      | 60 $\pm$ 6    | 23 $\pm$ 6 | 17 $\pm$ 0 | 7 $\pm$ 3                      | 12.41 $\pm$ 2.03  | 5.38 $\pm$ 0.10 | 12.78 $\pm$ 0.96     | 0.69 $\pm$ 0.07 |
|           | 5 – 10     | 75 $\pm$ 2    | 19 $\pm$ 2 | 6 $\pm$ 1  | 121 $\pm$ 67                   | 3.79 $\pm$ 1.16   | 5.51 $\pm$ 0.04 | 9.59 $\pm$ 4.26      | 0.54 $\pm$ 0.18 |
|           | 10 – 15    | 80 $\pm$ 2    | 14 $\pm$ 3 | 6 $\pm$ 1  | 72 $\pm$ 44                    | 1.01 $\pm$ 0.19   | 5.58 $\pm$ 0.02 | 11.47 $\pm$ 3.27     | 0.72 $\pm$ 0.14 |
|           | 15 – 20    | 79 $\pm$ 3    | 15 $\pm$ 2 | 6 $\pm$ 1  | 119 $\pm$ 57                   | 1.30 $\pm$ 0.26   | 5.53 $\pm$ 0.00 | 8.29 $\pm$ 2.67      | 0.5 $\pm$ 0.15  |
|           | 20 – 25    | 82 $\pm$ 1    | 11 $\pm$ 2 | 7 $\pm$ 0  | 203 $\pm$ 63                   | 2.52 $\pm$ 1.07   | 5.63 $\pm$ 0.02 | 5.82 $\pm$ 0.76      | 0.34 $\pm$ 0.07 |
|           | 25 – 30    | 82 $\pm$ 5    | 11 $\pm$ 3 | 7 $\pm$ 2  | 129 $\pm$ 46                   | 2.05 $\pm$ 0.58   | 5.69 $\pm$ 0.02 | 3.72 $\pm$ 0.72      | 0.2 $\pm$ 0.04  |

**Table S4.** Barcode identification for each of the samples analyzed. Raw data were deposited under the study accession number PRJNA384296 in the NCBI Sequence Read Archive (SRA). For 16S rRNA genes, primers used: F515 (5'-GTGCCAGCMGCCGCGGTAA-3'), R806 (5'-GGACTACVSGGGTATCTAAT-3'). For *pmoA* genes, primer set first round PCR (A189f/A682r) and second round multiplex PCR (A189f/A650r/mb661r): A189f (5'-GGNGACTGGGACTTCTGG-3'), A682r (5'-GAASGCNGAGAAGAASGC-3'), A650r (5'-ACGTCCTTACCGAAGGT-3'), mb661r (5'-CCGGMGCAACGTCYTTACC-3').

| Sample | Target gene | Soil – file name                         | Barcode |
|--------|-------------|------------------------------------------|---------|
| B1-0   | 16S rRNA    | fresh soil-bog- depth0cm-replicate-1     | GTCACA  |
| B2-0   | 16S rRNA    | fresh soil-bog- depth0cm-replicate-2     | TAGCAT  |
| B3-0   | 16S rRNA    | fresh soil-bog- depth0cm-replicate-3     | ACGTAC  |
| B4-0   | 16S rRNA    | fresh soil-bog- depth0cm-replicate-4     | TCAGAG  |
| B1-5   | 16S rRNA    | fresh soil-bog- depth5cm-replicate-1     | AGCTGA  |
| B2-5   | 16S rRNA    | fresh soil-bog- depth5cm-replicate-2     | CACAGT  |
| B3-5   | 16S rRNA    | fresh soil-bog- depth5cm-replicate-3     | AGAGTC  |
| B4-5   | 16S rRNA    | fresh soil-bog- depth5cm-replicate-4     | CGTATA  |
| B1-10  | 16S rRNA    | fresh soil-bog- depth10cm-replicate-1    | AGTCAG  |
| B2-10  | 16S rRNA    | fresh soil-bog- depth10cm-replicate-2    | CAGTCA  |
| B3-10  | 16S rRNA    | fresh soil-bog- depth10cm-replicate-3    | AGCTGA  |
| B4-10  | 16S rRNA    | fresh soil-bog- depth10cm-replicate-4    | GACTION |
| B1-15  | 16S rRNA    | fresh soil-bog- depth15cm-replicate-1    | ATATCG  |
| B2-15  | 16S rRNA    | fresh soil-bog- depth15cm-replicate-2    | CATGAC  |
| B3-15  | 16S rRNA    | fresh soil-bog- depth15cm-replicate-3    | AGTCAG  |
| B4-15  | 16S rRNA    | fresh soil-bog- depth15cm-replicate-4    | GAGATC  |
| B1-20  | 16S rRNA    | fresh soil-bog- depth20cm-replicate-1    | ATCGAT  |
| B2-20  | 16S rRNA    | fresh soil-bog- depth20cm-replicate-2    | CGATAT  |
| B3-20  | 16S rRNA    | fresh soil-bog- depth20cm-replicate-3    | ATATCG  |
| B4-20  | 16S rRNA    | fresh soil-bog- depth20cm-replicate-4    | GATCGA  |
| B1-25  | 16S rRNA    | fresh soil-bog- depth25cm-replicate-1    | ATGCTA  |
| B2-25  | 16S rRNA    | fresh soil-bog- depth25cm-replicate-2    | CGCGCG  |
| B3-25  | 16S rRNA    | fresh soil-bog- depth25cm-replicate-3    | ATCGAT  |
| B4-25  | 16S rRNA    | fresh soil-bog- depth25cm-replicate-4    | GTACAC  |
| F1-0   | 16S rRNA    | fresh soil-forest- depth0cm-replicate-1  | TACGTA  |
| F2-0   | 16S rRNA    | fresh soil-forest- depth0cm-replicate-2  | TATACG  |
| F3-0   | 16S rRNA    | fresh soil-forest- depth0cm-replicate-3  | ACTGCA  |
| F4-0   | 16S rRNA    | fresh soil-forest- depth0cm-replicate-4  | TCTCTC  |
| F1-5   | 16S rRNA    | fresh soil-forest- depth5cm-replicate-1  | ACACGT  |
| F2-5   | 16S rRNA    | fresh soil-forest- depth5cm-replicate-2  | AGTCAG  |
| F3-5   | 16S rRNA    | fresh soil-forest- depth5cm-replicate-3  | CGTATA  |
| F4-5   | 16S rRNA    | fresh soil-forest- depth5cm-replicate-4  | CAGTCA  |
| F1-10  | 16S rRNA    | fresh soil-forest- depth10cm-replicate-1 | ACGTAC  |
| F2-10  | 16S rRNA    | fresh soil-forest- depth10cm-replicate-2 | ATATCG  |
| F3-10  | 16S rRNA    | fresh soil-forest- depth10cm-replicate-3 | GACTION |
| F4-10  | 16S rRNA    | fresh soil-forest- depth10cm-replicate-4 | CATGAC  |
| F1-15  | 16S rRNA    | fresh soil-forest- depth15cm-replicate-1 | ACTGCA  |
| F2-15  | 16S rRNA    | fresh soil-forest- depth15cm-replicate-2 | ATCGAT  |
| F3-15  | 16S rRNA    | fresh soil-forest- depth15cm-replicate-3 | GAGATC  |

|            |             |                                          |        |
|------------|-------------|------------------------------------------|--------|
| F4-15      | 16S rRNA    | fresh soil-forest- depth15cm-replicate-4 | CGATAT |
| F1-20      | 16S rRNA    | fresh soil-forest- depth20cm-replicate-1 | AGAGTC |
| F2-20      | 16S rRNA    | fresh soil-forest- depth20cm-replicate-2 | ATGCTA |
| F3-20      | 16S rRNA    | fresh soil-forest- depth20cm-replicate-3 | GATCGA |
| F4-20      | 16S rRNA    | fresh soil-forest- depth20cm-replicate-4 | CGCGCG |
| F1-25      | 16S rRNA    | fresh soil-forest- depth25cm-replicate-1 | AGCTGA |
| F2-25      | 16S rRNA    | fresh soil-forest- depth25cm-replicate-2 | CACAGT |
| F3-25      | 16S rRNA    | fresh soil-forest- depth25cm-replicate-3 | GTACAC |
| G1-0       | 16S rRNA    | fresh soil-grass- depth0cm-replicate-1   | GTGTGT |
| G2-0       | 16S rRNA    | fresh soil-grass- depth0cm-replicate-2   | GTGTGT |
| G3-0       | 16S rRNA    | fresh soil-grass- depth0cm-replicate-3   | ATGCTA |
| G4-0       | 16S rRNA    | fresh soil-grass- depth0cm-replicate-4   | TCGAGA |
| G1-5       | 16S rRNA    | fresh soil-grass- depth5cm-replicate-1   | GACTAG |
| G2-5       | 16S rRNA    | fresh soil-grass- depth5cm-replicate-2   | TACGTA |
| G3-5       | 16S rRNA    | fresh soil-grass- depth5cm-replicate-3   | CACAGT |
| G4-5       | 16S rRNA    | fresh soil-grass- depth5cm-replicate-4   | TCTCTC |
| G1-10      | 16S rRNA    | fresh soil-grass- depth10cm-replicate-1  | GAGATC |
| G2-10      | 16S rRNA    | fresh soil-grass- depth10cm-replicate-2  | TAGCAT |
| G3-10      | 16S rRNA    | fresh soil-grass- depth10cm-replicate-3  | CAGTCA |
| G4-10      | 16S rRNA    | fresh soil-grass- depth10cm-replicate-4  | ACACGT |
| G1-15      | 16S rRNA    | fresh soil-grass- depth15cm-replicate-1  | GATCGA |
| G2-15      | 16S rRNA    | fresh soil-grass- depth15cm-replicate-2  | TATACG |
| G3-15      | 16S rRNA    | fresh soil-grass- depth15cm-replicate-3  | CATGAC |
| G4-15      | 16S rRNA    | fresh soil-grass- depth15cm-replicate-4  | ACGTAC |
| G1-20      | 16S rRNA    | fresh soil-grass- depth20cm-replicate-1  | GTACAC |
| G2-20      | 16S rRNA    | fresh soil-grass- depth20cm-replicate-2  | TCAGAG |
| G3-20      | 16S rRNA    | fresh soil-grass- depth20cm-replicate-3  | CGATAT |
| G4-20      | 16S rRNA    | fresh soil-grass- depth20cm-replicate-4  | ACTGCA |
| G1-25      | 16S rRNA    | fresh soil-grass- depth25cm-replicate-1  | GTCACA |
| G2-25      | 16S rRNA    | fresh soil-grass- depth25cm-replicate-2  | TCGAGA |
| G3-25      | 16S rRNA    | fresh soil-grass- depth25cm-replicate-3  | CGCGCG |
| G4-25      | 16S rRNA    | fresh soil-grass- depth25cm-replicate-4  | AGAGTC |
| pmoA-B1-0  | <i>pmoA</i> | fresh soil-bog- depth0cm-replicate-1     | CACAGT |
| pmoA-B2-0  | <i>pmoA</i> | fresh soil-bog- depth0cm-replicate-2     | GACTAG |
| pmoA-B3-0  | <i>pmoA</i> | fresh soil-bog- depth0cm-replicate-3     | TACGTA |
| pmoA-B1-5  | <i>pmoA</i> | fresh soil-bog- depth5cm-replicate-1     | CAGTCA |
| pmoA-B2-5  | <i>pmoA</i> | fresh soil-bog- depth5cm-replicate-2     | GAGATC |
| pmoA-B3-5  | <i>pmoA</i> | fresh soil-bog- depth5cm-replicate-3     | TAGCAT |
| pmoA-B1-10 | <i>pmoA</i> | fresh soil-bog- depth10cm-replicate-1    | CATGAC |
| pmoA-B2-10 | <i>pmoA</i> | fresh soil-bog- depth10cm-replicate-2    | GATCGA |
| pmoA-B3-10 | <i>pmoA</i> | fresh soil-bog- depth10cm-replicate-3    | TATACG |
| pmoA-B1-15 | <i>pmoA</i> | fresh soil-bog- depth15cm-replicate-1    | CGATAT |
| pmoA-B2-15 | <i>pmoA</i> | fresh soil-bog- depth15cm-replicate-2    | GTACAC |
| pmoA-B3-15 | <i>pmoA</i> | fresh soil-bog- depth15cm-replicate-3    | TCAGAG |
| pmoA-B1-20 | <i>pmoA</i> | fresh soil-bog- depth20cm-replicate-1    | CGCGCG |
| pmoA-B2-20 | <i>pmoA</i> | fresh soil-bog- depth20cm-replicate-2    | GTCACA |
| pmoA-B3-20 | <i>pmoA</i> | fresh soil-bog- depth20cm-replicate-3    | TCGAGA |
| pmoA-B1-25 | <i>pmoA</i> | fresh soil-bog- depth25cm-replicate-1    | CGTATA |
| pmoA-B2-25 | <i>pmoA</i> | fresh soil-bog- depth25cm-replicate-2    | GTGTGT |

|            |             |                                          |        |
|------------|-------------|------------------------------------------|--------|
| pmoA-B3-25 | <i>pmoA</i> | fresh soil-bog- depth25cm-replicate-3    | TCTCTC |
| pmoA-F1-0  | <i>pmoA</i> | fresh soil-forest- depth0cm-replicate-1  | ACACGT |
| pmoA-F2-0  | <i>pmoA</i> | fresh soil-forest- depth0cm-replicate-2  | ATATCG |
| pmoA-F3-0  | <i>pmoA</i> | fresh soil-forest- depth0cm-replicate-3  | CGATAT |
| pmoA-F1-5  | <i>pmoA</i> | fresh soil-forest- depth5cm-replicate-1  | ACGTAC |
| pmoA-F2-5  | <i>pmoA</i> | fresh soil-forest- depth5cm-replicate-2  | ATCGAT |
| pmoA-F3-5  | <i>pmoA</i> | fresh soil-forest- depth5cm-replicate-3  | CGCGCG |
| pmoA-F1-10 | <i>pmoA</i> | fresh soil-forest- depth10cm-replicate-1 | ACTGCA |
| pmoA-F2-10 | <i>pmoA</i> | fresh soil-forest- depth10cm-replicate-2 | ATGCTA |
| pmoA-F3-10 | <i>pmoA</i> | fresh soil-forest- depth10cm-replicate-3 | CGTATA |
| pmoA-F1-15 | <i>pmoA</i> | fresh soil-forest- depth15cm-replicate-1 | AGAGTC |
| pmoA-F2-15 | <i>pmoA</i> | fresh soil-forest- depth15cm-replicate-2 | CACAGT |
| pmoA-F3-15 | <i>pmoA</i> | fresh soil-forest- depth15cm-replicate-3 | GACTAG |
| pmoA-F1-20 | <i>pmoA</i> | fresh soil-forest- depth20cm-replicate-1 | AGCTGA |
| pmoA-F2-20 | <i>pmoA</i> | fresh soil-forest- depth20cm-replicate-2 | CAGTCA |
| pmoA-F3-20 | <i>pmoA</i> | fresh soil-forest- depth20cm-replicate-3 | GAGATC |
| pmoA-F1-25 | <i>pmoA</i> | fresh soil-forest- depth25cm-replicate-1 | AGTCAG |
| pmoA-F2-25 | <i>pmoA</i> | fresh soil-forest- depth25cm-replicate-2 | CATGAC |
| pmoA-F3-25 | <i>pmoA</i> | fresh soil-forest- depth25cm-replicate-3 | GATCGA |
| pmoA-G1-0  | <i>pmoA</i> | fresh soil-grass- depth0cm-replicate-1   | GTACAC |
| pmoA-G2-0  | <i>pmoA</i> | fresh soil-grass- depth0cm-replicate-2   | TCAGAG |
| pmoA-G3-0  | <i>pmoA</i> | fresh soil-grass- depth0cm-replicate-3   | AGAGTC |
| pmoA-G1-5  | <i>pmoA</i> | fresh soil-grass- depth5cm-replicate-1   | GTCACA |
| pmoA-G2-5  | <i>pmoA</i> | fresh soil-grass- depth5cm-replicate-2   | TCGAGA |
| pmoA-G3-5  | <i>pmoA</i> | fresh soil-grass- depth5cm-replicate-3   | AGCTGA |
| pmoA-G1-10 | <i>pmoA</i> | fresh soil-grass- depth10cm-replicate-1  | GTGTGT |
| pmoA-G2-10 | <i>pmoA</i> | fresh soil-grass- depth10cm-replicate-2  | TCTCTC |
| pmoA-G3-10 | <i>pmoA</i> | fresh soil-grass- depth10cm-replicate-3  | AGTCAG |
| pmoA-G1-15 | <i>pmoA</i> | fresh soil-grass- depth15cm-replicate-1  | TACGTA |
| pmoA-G2-15 | <i>pmoA</i> | fresh soil-grass- depth15cm-replicate-2  | ACACGT |
| pmoA-G3-15 | <i>pmoA</i> | fresh soil-grass- depth15cm-replicate-3  | ATATCG |
| pmoA-G1-20 | <i>pmoA</i> | fresh soil-grass- depth20cm-replicate-1  | TAGCAT |
| pmoA-G2-20 | <i>pmoA</i> | fresh soil-grass- depth20cm-replicate-2  | ACGTAC |
| pmoA-G3-20 | <i>pmoA</i> | fresh soil-grass- depth20cm-replicate-3  | ATCGAT |
| pmoA-G1-25 | <i>pmoA</i> | fresh soil-grass- depth25cm-replicate-1  | TATACG |
| pmoA-G2-25 | <i>pmoA</i> | fresh soil-grass- depth25cm-replicate-2  | ACTGCA |
| pmoA-G3-25 | <i>pmoA</i> | fresh soil-grass- depth25cm-replicate-3  | ATGCTA |

---

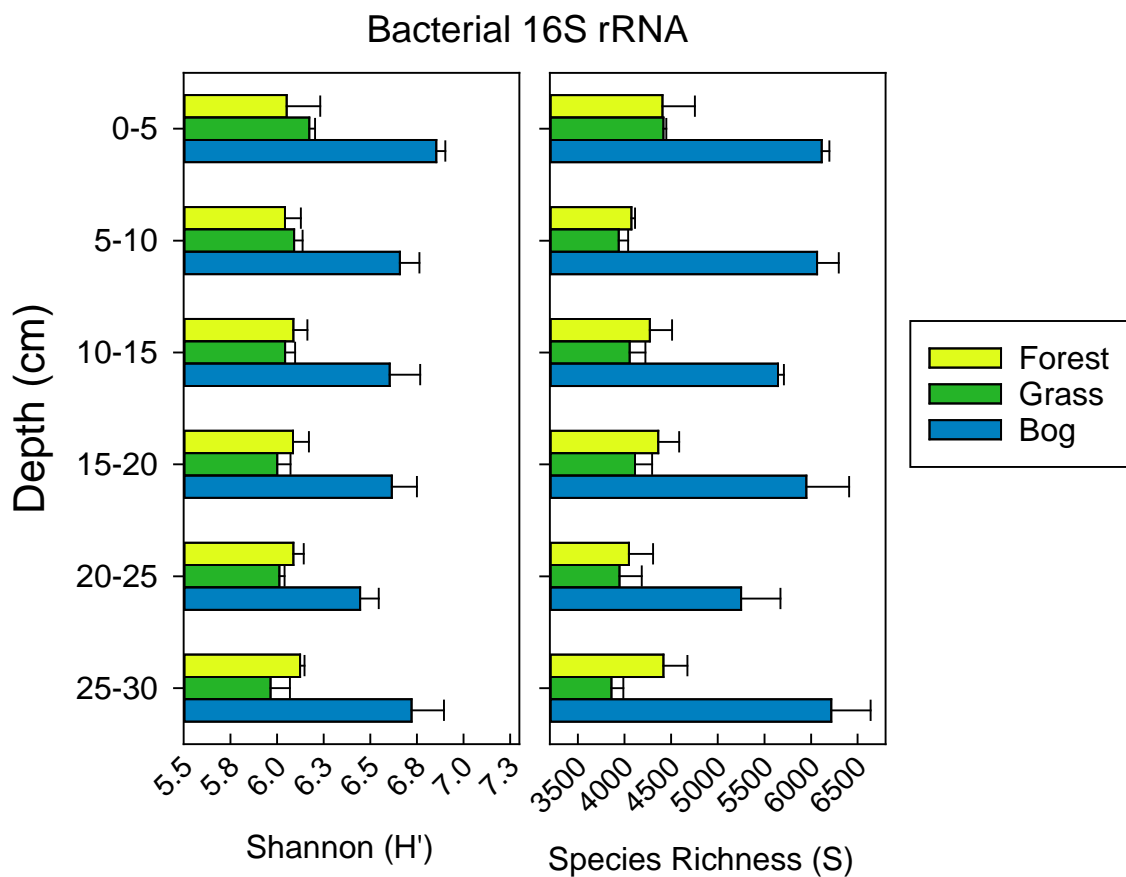

**Figure S1.** Bacterial 16S rRNA gene diversity measured as Shannon Diversity ( $H'$ ) and Richness ( $S$ ) ( $n=4$ , means  $\pm$  standard errors).

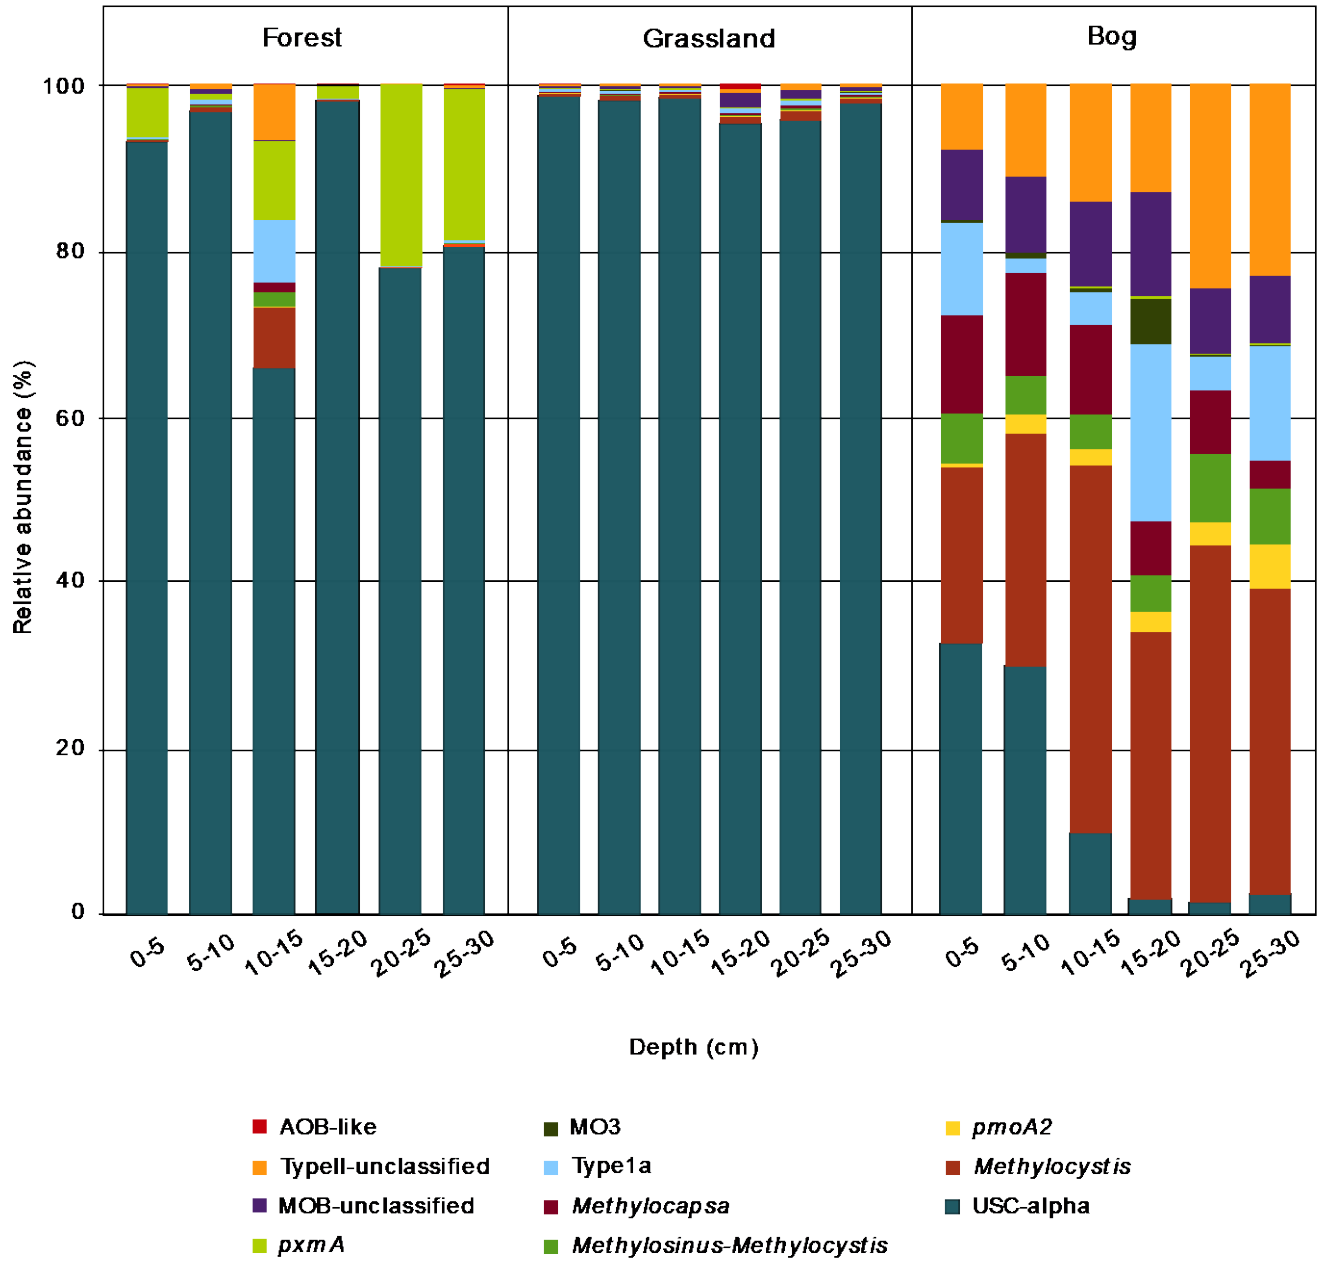

**Figure S2.** Relative abundance of *pmoA* genes of the dominant methanotroph groups.

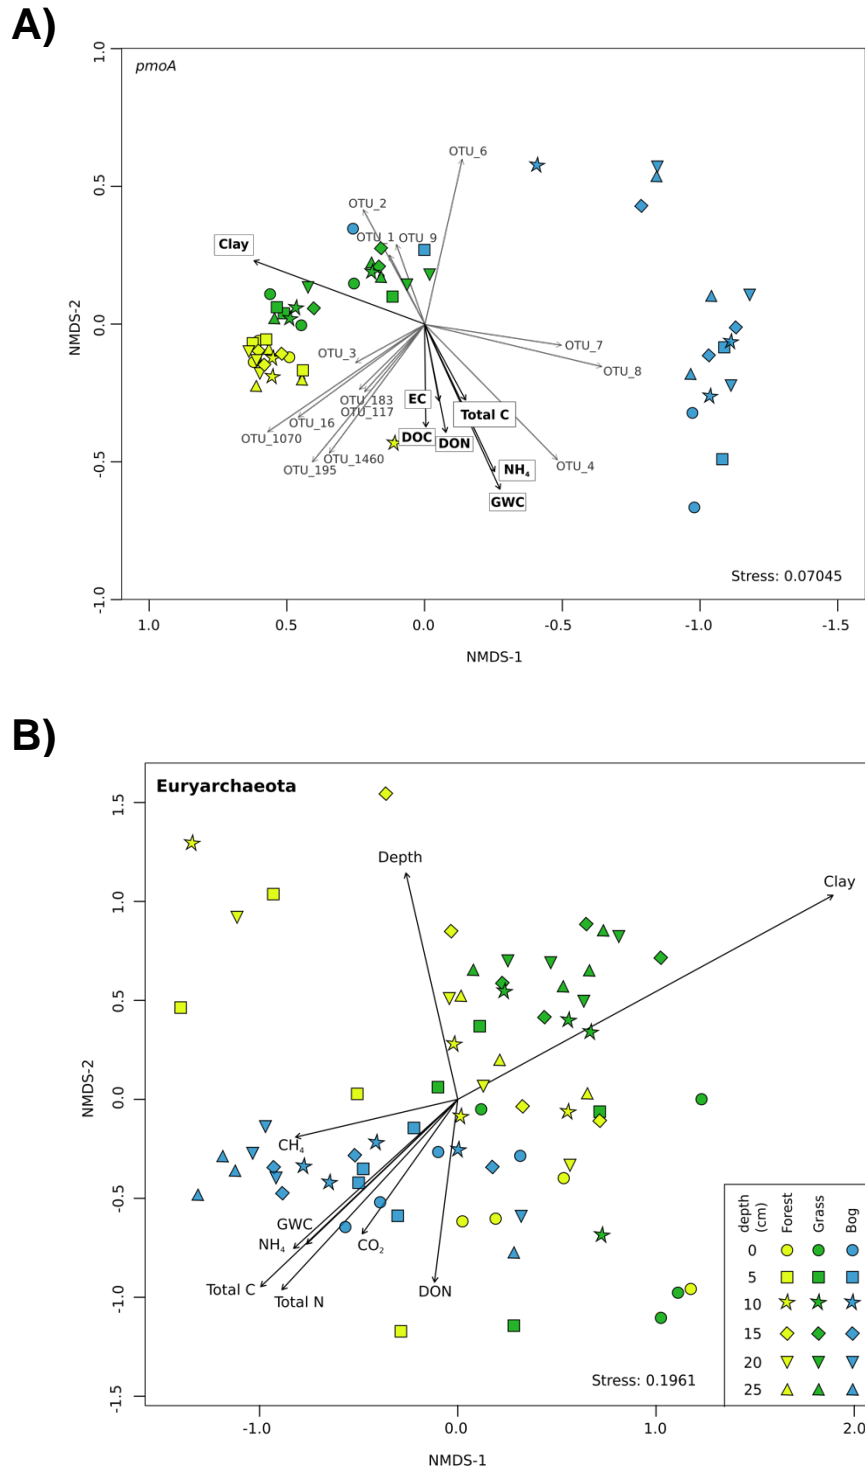

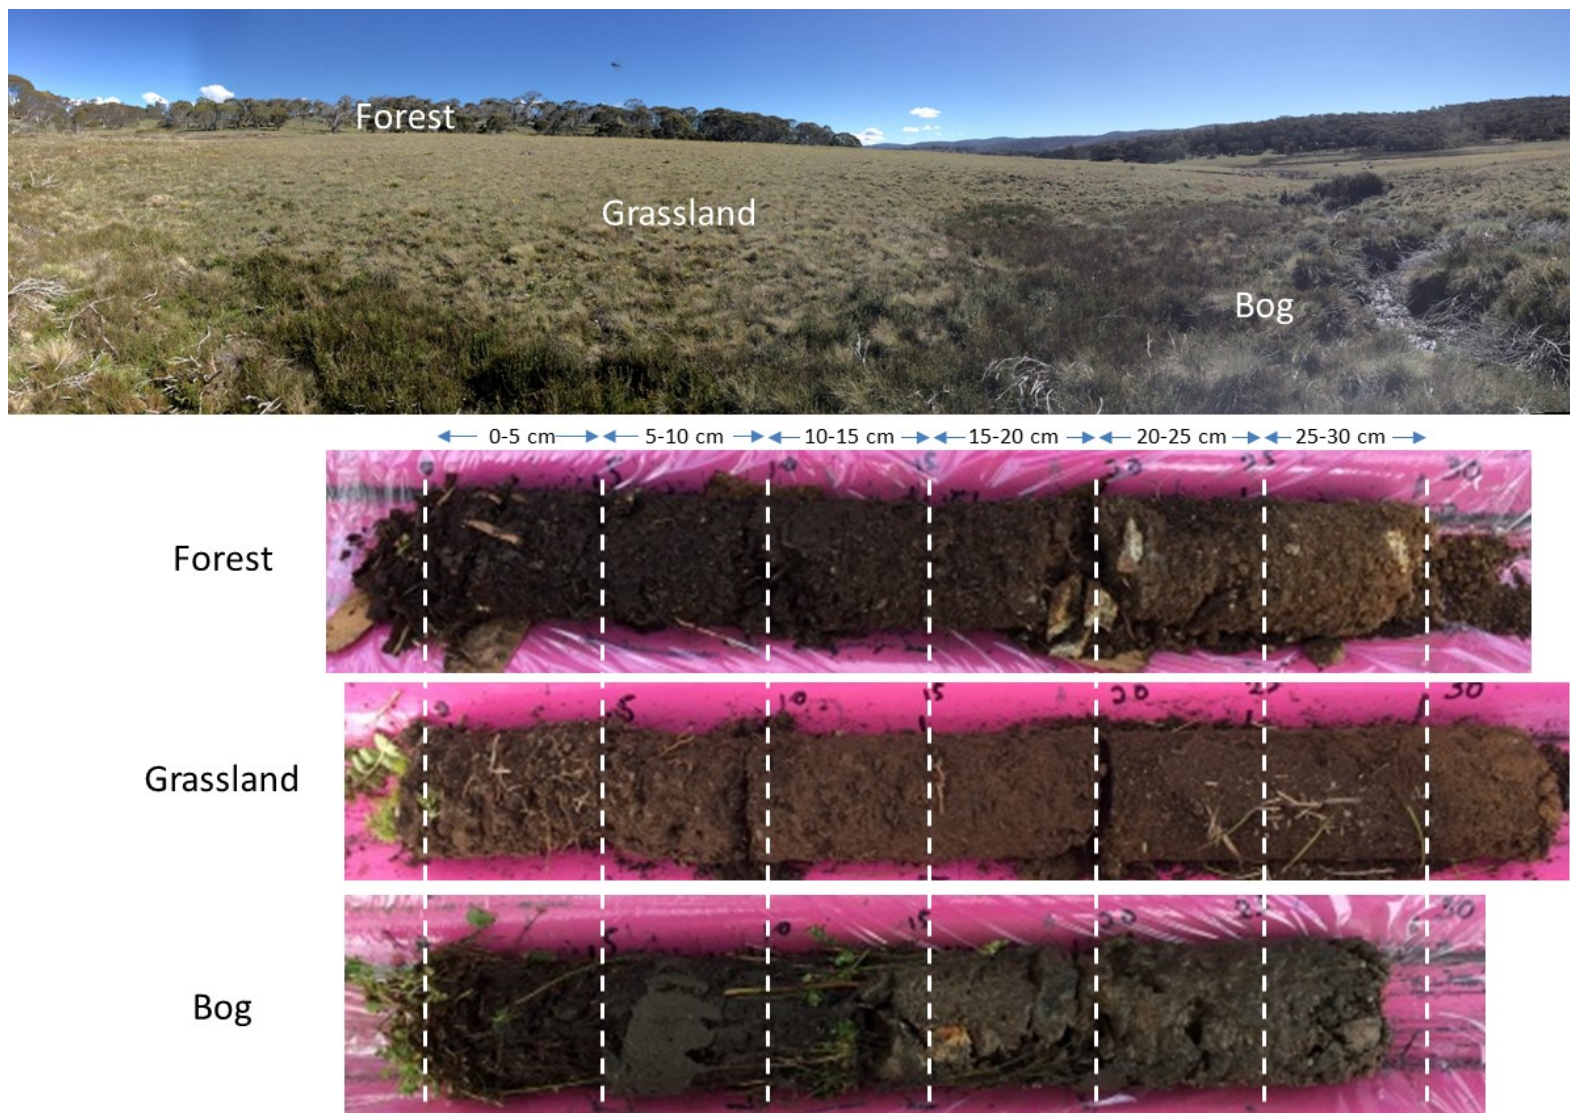

**Figure S4.** Soil/Vegetation gradient (Forest-Grassland-Bog) located in Snowy Mountains region near Kosciuszko National Park, NSW, Australia. Soil/vegetation types shown above, below are three soil cores from each of the soil/vegetation types.
